# Supplementary material for: Near IR excitation of heavy atom free Bodipy photosensitizers through the intermediacy of upconverting nanoparticles
Source: Royal Society of Chemistry journal article supplement (doi:10.1039/c4cc03387f), 2014-01-01
Supplement: c4cc03387f1.pdf [file c4cc03387f1.pdf]

# Near IR Excitation of Heavy Atom Free Bodipy Photosensitizers Through the Intermediacy of Upconverting Nanoparticles

Seda Demirel Topel,<sup>a</sup> Günseli Turgut Cin<sup>a</sup> and Engin U. Akkaya<sup>\*b,c</sup>

<sup>a</sup> Department of Chemistry, Faculty of Science, Akdeniz University, 07058, Antalya, Turkey

<sup>b</sup> UNAM-National Nanotechnology Research Center, Bilkent University, 06800, Ankara, Turkey.

<sup>c</sup> Department of Chemistry, Bilkent University, 06800, Ankara, Turkey.

\*E-mail: [eua@fen.bilkent.edu.tr](mailto:eua@fen.bilkent.edu.tr)

## SUPPORTING INFORMATION

|                                                                                                                                            |    |
|--------------------------------------------------------------------------------------------------------------------------------------------|----|
| 1. <i>Materials and Methods</i> .....                                                                                                      | 2  |
| 2. <i>Synthesis of BODIPY Photosensitizers</i> .....                                                                                       | 4  |
| 3. <i><sup>1</sup>H, <sup>13</sup>C -NMR and Mass Spectra</i> .....                                                                        | 7  |
| 4. <i>Characterization of Upconverting Nanoparticles (UCNPs): NaYF<sub>4</sub>: Yb<sup>+3</sup>, Er<sup>+3</sup>/Ce<sup>+3</sup></i> ..... | 19 |
| 5. <i>Singlet Oxygen Measurements of BODIPY Conjugated Upconversion Nanoparticles</i> .....                                                | 21 |

## 1. Materials and methods

All the chemicals and solvents (spectroscopic grade) were purchased from Merck or Sigma and were used without any further purification. Reactions were monitored by thin layer chromatography using Merck TLC Silica gel 60 F254. Silica gel column chromatography was performed over Merck Silica gel 60 (particle size: 0.040-0.063 mm, 230-400 mesh ASTM).  $^1\text{H-NMR}$  and  $^{13}\text{C-NMR}$  spectra were recorded on Bruker DPX-400 in  $\text{CDCl}_3$  solvent with tetramethylsilane as internal standard. All spectra were recorded at  $25^\circ\text{C}$  and coupling constants ( $J$  values) are given in Hz. Chemical shifts are given in parts per million (ppm). Mass spectra were recorded with Agilent Technologies 6224 TOF LC/MS and 6530 Accurate Mass Q-TOF LC/MS. 1,3-Diphenylisobenzofuran was used as a singlet oxygen trap in organic solvent measurements and was purchased from supplier.

The synthesis procedure of the upconverting nanoparticles as follows: In a 100 mL teflon beaker, rare-earth chloride salts  $\text{YCl}_3 \cdot 6\text{H}_2\text{O}$  (0.72 mmol),  $\text{YbCl}_3 \cdot 6\text{H}_2\text{O}$  (0.2 mmol),  $\text{ErCl}_3 \cdot 6\text{H}_2\text{O}$  (0.05 mmol),  $\text{CeCl}_3 \cdot 6\text{H}_2\text{O}$  (0.03 mmol) and  $\text{NaCl}$  (1.0 mmol) were dissolved in 4.0 ml dd water. Polyethyleneimine (PEI, 1 g, MW: 10,000 g/mol) was dissolved in 20.0 ml dd. water and added to the solution of rare earth salts.  $\text{NH}_4\text{F}$  (5 mmol) in 50 ml ethanol was added to the teflon beaker dropwise. After purging of air by bubbling Ar for 20 minutes, the reaction mixture was sealed and heated at  $200^\circ\text{C}$  for 3 hours. The upconverting nanoparticles were collected by centrifuge at 10,000 rpm for 10 minutes. The nanoparticles were washed three times with ethanol/water (1:1) and dried *in vacuo* at  $40^\circ\text{C}$ .

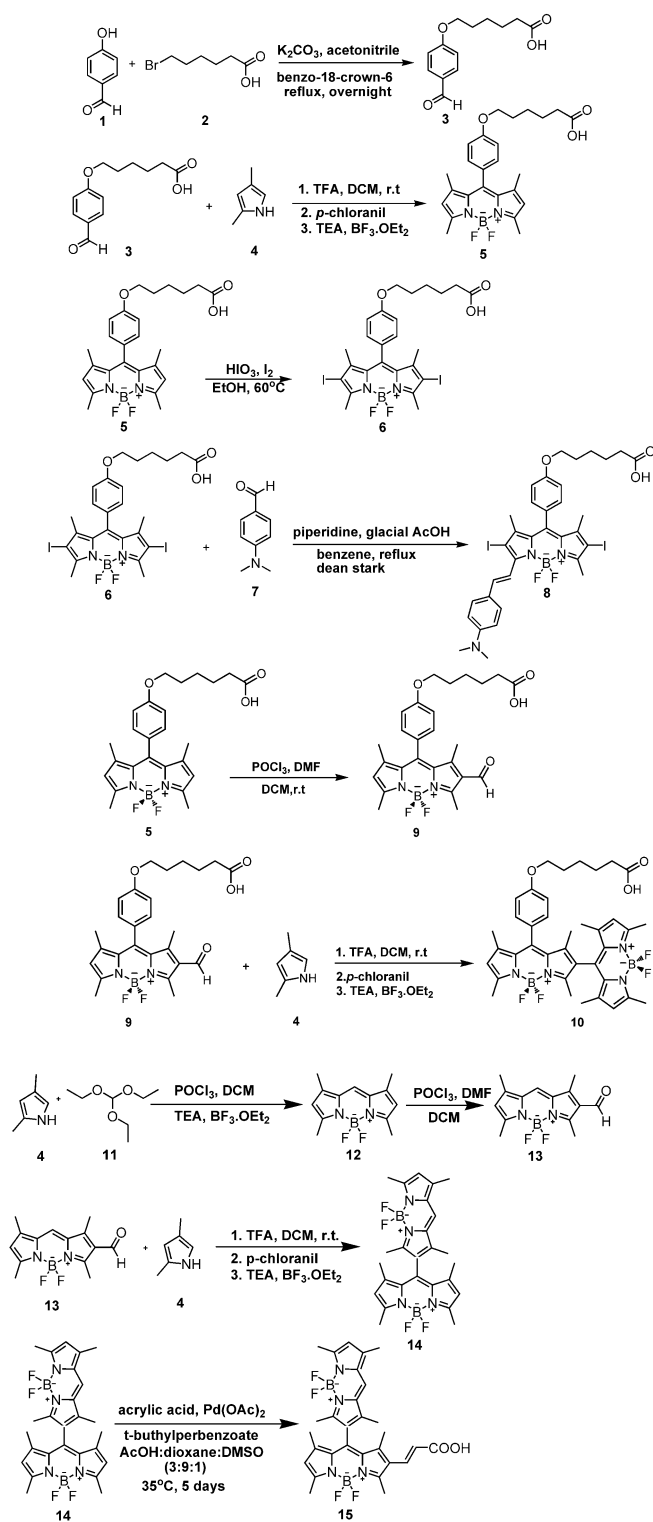

**Scheme S1** Synthetic routes for the carboxy-functionalized dyes: styryl-Bodipy **8**, orthogonal Bodipy dimers **10**, and **15**. The numbering in the ESI is based on this scheme.

## 2. Synthesis of BODIPY photosensitizers

*The numbering of the compounds in the ESI is based on the synthesis scheme on the previous page.*

**2.a. Synthesis of BODIPY-8:** *p*-Hydroxybenzaldehyde (**1**) (1000 mg, 8.18 mmol) was dissolved in acetonitrile (20 ml). K<sub>2</sub>CO<sub>3</sub> (9.58 mg, 49.08 mmol) and a catalytic amount of benzo-18-crown-6 was added to the first solution. Into this solution, 6-bromohexanoic acid (**2**) (2.40 mg, 12.28 mmol) dissolved in acetonitrile (15 ml) was added. Reaction mixture was refluxed overnight. Progress of the reaction was monitored by TLC. When all the starting material had been consumed, the reaction mixture was filtered and washed with cold acetonitrile for two times. White crude was dissolved in dd water (15 ml) then neutralized with 4M HCl. White precipitates were filtered and dried. 6-(4-formylphenoxy)hexanoic acid (**3**) were obtained in 58% yield. <sup>1</sup>H-NMR (400 MHz, CDCl<sub>3</sub>): δ<sub>H</sub> 7.51 (d, 2H, *J*=8.4 Hz, Ar-CH), 6.70 (d, 2H, *J*=8.4 Hz, Ar-CH), 3.75 (t, 2H, *J*= 6.3 Hz, CH<sub>2</sub>), 2.01 (t, 2H, *J*= 7.2 Hz, CH<sub>2</sub>), 1.56-1.49 (m, 2H, CH<sub>2</sub>), 1.41-1.34 (m, 2H, CH<sub>2</sub>), 1.25-1.19 (m, 2H, CH<sub>2</sub>). <sup>13</sup>C-NMR (100 MHz, CDCl<sub>3</sub>): δ<sub>C</sub> 195.1 (C=O), 176.5 (C=O), 166.0 (C<sub>ipso</sub>), 136.0 (CH), 130.0 (C<sub>ipso</sub>), 118.7 (CH), 72.0 (CH<sub>2</sub>), 37.8 (CH<sub>2</sub>), 32.5 (CH<sub>2</sub>), 29.4 (CH<sub>2</sub>), 28.4 (CH<sub>2</sub>).

In argon bubbled 250 mL dichloromethane, 6-(4-formylphenoxy)hexanoic acid (**3**) (700 mg, 2.96 mmol) and 2,4-dimethylpyrrole (**4**) (564 mg, 5.92 mmol) were mixed. 1 drop of trifluoroacetic acid (TFA) was also added. The reaction mixture was stirred at room temperature overnight. Then *p*-chloranil (800 mg, 3.26 mmol) was added to the reaction medium. After stirring 5 hours at room temperature, TEA (triethylamine) (5 mL) and BF<sub>3</sub>·OEt<sub>2</sub> (5 mL) was added and stirred again for further 1 hour. The reaction was stopped by extracting with water (3x250 mL). Organic phase was dried over Na<sub>2</sub>SO<sub>4</sub> and evaporated. The crude was purified by column chromatography with MeOH (3%)- CHCl<sub>3</sub> yielded the orange product (**5**) (22 %). <sup>1</sup>H-NMR (400 MHz, CDCl<sub>3</sub>): δ<sub>H</sub> 7.16 (d, 2H, *J*=8.6 Hz, Ar-CH), 7.00 (d, 2H, *J*=8.6 Hz, Ar-CH), 5.99 (s, 2H, CH), 4.03 (t, 2H, *J*=6.4 Hz, CH<sub>2</sub>), 2.56 (s, 6H, CH<sub>3</sub>), 2.44 (t, 2H, *J*=7.4 Hz, CH<sub>2</sub>), 1.89-1.84 (m, 2H, CH<sub>2</sub>), 1.78-1.73 (m, 2H, CH<sub>2</sub>), 1.63-1.57 (m, 2H, CH<sub>2</sub>), 1.45 (s, 6H, CH<sub>3</sub>). <sup>13</sup>C-NMR (100 MHz, CDCl<sub>3</sub>): δ<sub>C</sub> 179.0 (COOH), 159.6 (C<sub>ipso</sub>), 155.2 (C<sub>ipso</sub>), 143.2 (C<sub>ipso</sub>), 141.9 (C<sub>ipso</sub>), 131.9 (C<sub>ipso</sub>), 129.2 (CH), 127.0 (C<sub>ipso</sub>), 121.1 (CH), 115.1 (CH), 67.7 (CH<sub>2</sub>), 33.9 (CH<sub>3</sub>), 28.9 (CH<sub>2</sub>), 25.6 (CH<sub>2</sub>), 24.5 (CH<sub>2</sub>) ve 14.6 (CH<sub>2</sub>).

Compound **5** (500 mg, 1.1 mmol) was dissolved in ethanol (200 ml). To this solution, iodide (586.30 mg, 2.31 mmol) and HIO<sub>3</sub> (iodic acid) (483.8 mg, 2.75 mmol) were added, then heated at 60°C for 1.5h. Progress of the reaction was monitored by TLC. When all the starting material had been consumed, the reaction was evaporated. The pink crude was dissolved in DCM then extracted with sodium thiosulphate saturated water (100 ml x 2). Organic phase was dried over Na<sub>2</sub>SO<sub>4</sub> and evaporated. The crude was purified by column chromatography using MeOH (3%)- CHCl<sub>3</sub> solvent mixture yielded the pink product (**6**) (35 %). <sup>1</sup>H-NMR (400 MHz, CDCl<sub>3</sub>): δ<sub>H</sub> 7.03 (d, 2H, *J*=8.4 Hz, Ar-CH), 6.93 (d, 2H, *J*=8.4 Hz, Ar-CH), 3.94 (t, 2H, *J*= 6.4 Hz, CH<sub>2</sub>), 2.54 (s, 6H, CH<sub>3</sub>), 2.29 (t, 2H, *J*= 7.4 Hz, CH<sub>2</sub>), 1.81- 1.72 (m, 2H, CH<sub>2</sub>), 1.69-1.61 (m, 2H, CH<sub>2</sub>) ve 1.52- 1.50 (m, 2H, CH<sub>2</sub>), 1.35 (s, 6H, CH<sub>3</sub>). <sup>13</sup>C-NMR (100 MHz, CDCl<sub>3</sub>): δ<sub>C</sub> 176.7 (COOH), 160.0 (C<sub>ipso</sub>), 156.5 (C<sub>ipso</sub>), 145.4 (C<sub>ipso</sub>), 141.7 (C<sub>ipso</sub>), 131.7 (C<sub>ipso</sub>), 129.0 (CH), 128.9 (C<sub>ipso</sub>), 126.5 (C<sub>ipso</sub>), 115.4 (CH), 67.9 (CH<sub>2</sub>), 33.8 (CH<sub>3</sub>), 28.9 (CH<sub>2</sub>), 25.6 (CH<sub>2</sub>), 25.0 (CH<sub>2</sub>), 17.2 (CH<sub>3</sub>), 16.0 (CH<sub>2</sub>). MS HRMS (TOF-APCI): *m/z* calcd for C<sub>25</sub>H<sub>27</sub>BF<sub>2</sub>I<sub>2</sub>N<sub>2</sub>O<sub>3</sub>: 705.0172 [M-H<sup>+</sup>]; found: 705.0111 [M-H<sup>+</sup>], Δ = 8.6 ppm.

In a 100 mL round-bottomed flask equipped with a Dean-Stark trap and a reflux condenser, 50 mL of benzene, compound **6** (238.2 mg, 0.34 mmol), 4-(*N,N*-dimethylamino)benzaldehyde (**7**) (125.8 mg, 0.84 mmol), acetic acid (AcOH) (0.5 ml, 7.4 mmol) and piperidine (0.5 ml, 5 mmol) were added. The reaction mixture was stirred at reflux temperature and concentrated nearly to dryness. Progress of the reaction was monitored by TLC. When all the starting material had been consumed, water (100 mL) was added and mixture was extracted into CHCl<sub>3</sub>. The organic layer was dried over Na<sub>2</sub>SO<sub>4</sub> and evaporated. The crude was purified by column chromatography using MeOH (5%)- CHCl<sub>3</sub> solvent mixture yielded the blue product (**8**) (12 %). <sup>1</sup>H-NMR (400 MHz, CDCl<sub>3</sub>): δ<sub>H</sub> 8.15 (d, 1H, *J*= 16.7 Hz, CH), 7.50 (d, 2H, *J*= 8.6 Hz, Ar-CH), 7.45 (d, 1H, *J*= 16.7 Hz, CH), 7.09 (d, 2H, *J*= 8.2 Hz, Ar-CH), 6.97 (d, 2H, *J*=8.2 Hz, Ar-CH), 6.68 ppm (d, 2H, *J*= 8.6 Hz, Ar-CH), 3.99 (t, 2H, *J*= 6.0 Hz, CH<sub>2</sub>), 2.99 (s, 6H, CH<sub>3</sub>), 2.63 (s, 3H, CH<sub>3</sub>), 2.32-2.31 (m, 2H, CH<sub>2</sub>), 1.82-1.80 (m, 2H, CH<sub>2</sub>), 1.69-1.67 (m, 2H, CH<sub>2</sub>), 1.54-1.52 (m, 2H, CH<sub>2</sub>), 1.40 (s, 3H, *N*-CH<sub>3</sub>), 1.45 (s, 3H, CH<sub>3</sub>). <sup>13</sup>C-NMR (100 MHz, CDCl<sub>3</sub>): δ<sub>C</sub> 176.7 (COOH), 168.0 (C<sub>ipso</sub>), 159.9 (C<sub>ipso</sub>), 154.5 (C<sub>ipso</sub>), 151.0 (C<sub>ipso</sub>), 142.1 (C<sub>ipso</sub>), 142.0 (CH), 139.0 (CH),

129.5 (C<sub>ipso</sub>), 129.4 (Ar-CH), 129.3 (CH), 127.2 (C<sub>ipso</sub>), 115.3 (CH), 112.1 (CH), 67.8 (CH<sub>2</sub>), 40.3 (CH<sub>3</sub>), 33.5(CH<sub>3</sub>), 31.6 (CH<sub>2</sub>), 28.9 (CH<sub>2</sub>), 25.6 (CH<sub>2</sub>) ve 24.5 (CH<sub>2</sub>), 17.8, 17.1 (CH<sub>3</sub>), 17.1(CH<sub>3</sub>). MS HRMS (TOF-APCI): *m/z* calcd for C<sub>34</sub>H<sub>36</sub>BF<sub>2</sub>I<sub>2</sub>N<sub>3</sub>O<sub>3</sub>: 836.0907 [M-H<sup>+</sup>]; found: 836.0851[M-H<sup>+</sup>], Δ = 6.7 ppm.

**2.b. Synthesis of BODIPY-10:** In an oven dried 250 ml round bottom flask, POCl<sub>3</sub> (10 ml, 100 mmol) and DMF (10 ml, 12 mmol) was stirred in ice bath under argon atmosphere for 15 minutes, then stirred further 30 minutes at room temperature. Compound **5** (200 mg, 0.44 mmol) was dissolved in DCM (100ml) and added slowly to the first solution at room temperature. After 3 hours stirring at room temperature, it was seen that the reaction has been finished by checking with TLC. Then, reaction mixture was poured into cold and saturated NaHCO<sub>3</sub> solution slowly in ice-bath. The mixture was stirred for 30 minutes and extracted with DCM (100 mlx3). Organic phase was dried over Na<sub>2</sub>SO<sub>4</sub> and evaporated. The crude was purified by column chromatography using MeOH (1%)- CHCl<sub>3</sub> solvent mixture yielded the orange product (**9**) (75 %). <sup>1</sup>H-NMR (400 MHz, CDCl<sub>3</sub>): δ<sub>H</sub> 9.98 (s, 1H, -CHO), 7.12 (d, 2H, J=8.4 Hz, Ar-H), 7.01 (d, 2H, J=8.4 Hz, Ar-H), 6.13 (s, 1H, CH), 4.02 (t, 2H, J=6.3 Hz CH<sub>2</sub>), 2.79 (s, 3H, CH<sub>3</sub>), 2.58 (s, 3H, CH<sub>3</sub>), 2.41 (t, 2H, J=7.3 Hz CH<sub>2</sub>), 1.87-1.81 (m, 2H, CH<sub>2</sub>), 1.75-1.72 (m, 2H, CH<sub>2</sub>), 1.69 (s, 3H, CH<sub>3</sub>), 1.60-1.54 (m, 2H, CH<sub>2</sub>), 1.46 (s, 3H, CH<sub>3</sub>). <sup>13</sup>C-NMR (100 MHz, CDCl<sub>3</sub>): δ<sub>C</sub> 186.1 (CHO), 179.2 (COOH), 160.0 (Ar-C<sub>ipso</sub>), 156.2 (C<sub>ipso</sub>), 147.1 (Ar-C<sub>ipso</sub>), 142.7 (C<sub>ipso</sub>), 130.0 (C<sub>ipso</sub>), 128.9 (Ar-CH), 126.1 (C<sub>ipso</sub>), 123.8 (C<sub>ipso</sub>), 115.0 (Ar-CH), 68.2 (CH<sub>2</sub>), 34.1 (CH<sub>3</sub>), 29.0 (CH<sub>2</sub>), 25.7 (CH<sub>2</sub>), 24.4 (CH<sub>2</sub>), 15.2(CH<sub>2</sub>), 13.1 (CH<sub>3</sub>), 11.9 (CH<sub>3</sub>).

In argon bubbled 200 mL dichloromethane, compound **9** (173 mg, 0.36 mmol) and 2,4-dimethylpyrrole (**4**) (68.26 mg, 0.72 mmol) were mixed. 1 drop of trifluoroacetic acid was also added. The reaction mixture stirred at room temperature overnight. Then *p*-chloranil (97.36 mg, 0.396 mmol) was added to the reaction medium. After stirring 4 hours at room temperature, TEA (triethylamine) (2 mL) and BF<sub>3</sub>.OEt<sub>2</sub> (2 mL) was added and stirred again for further 1 hour. The reaction was stopped by extracting with water (3x200 mL). Organic phase was dried over Na<sub>2</sub>SO<sub>4</sub> and evaporated. The crude was purified by column chromatography with MeOH (3%)-CHCl<sub>3</sub> yielded the orange product (**10**) (32 %). <sup>1</sup>H-NMR (400 MHz, CDCl<sub>3</sub>): δ<sub>H</sub> 7.16 (d, 2H, J=8,4 Hz, Ar-H), 7.00 (d, 2H, J=8,4 Hz, Ar-H), 6.07 (s, 1H, CH), 5.98 (s, 2H, CH), 4.00 (t, 2H, J=6,4 Hz, CH<sub>2</sub>), 2.59 (s, 3H, CH<sub>3</sub>), 2.53 (s, 6H, CH<sub>3</sub>), 2.41 (t, 2H, J=8,0 Hz, CH<sub>2</sub>), 2.34 (s, 3H, CH<sub>3</sub>), 1.88-1.81 (m, 2H, CH<sub>2</sub>), 1.77-1.73 (m, 2H, CH<sub>2</sub>) 1.70 (s, 6H, CH<sub>3</sub>), 1.60-1.54 (m, 2H, CH<sub>2</sub>) 1.26 (s, 6H, CH<sub>3</sub>). <sup>13</sup>C-NMR (100 MHz, CDCl<sub>3</sub>): δ<sub>C</sub> 176.2 (COOH), 159.8 (Ar-C<sub>ipso</sub>), 157.7 (C<sub>ipso</sub>), 155.1 (C<sub>ipso</sub>), 150.0 (Ar-C<sub>ipso</sub>), 145.9 (C<sub>ipso</sub>), 142.4 (C<sub>ipso</sub>), 133.8 (C<sub>ipso</sub>), 131.0 (CH) , 130.0 (CH), 129.1 (Ar-CH), 126.5 (C<sub>ipso</sub>), 122.1 (C<sub>ipso</sub>), 121.2 (C<sub>ipso</sub>), 115.3 (Ar-CH), 67.8 (CH<sub>2</sub>), 33.7 (CH<sub>3</sub>), 31.5 (CH<sub>3</sub>), 28.9 (CH<sub>2</sub>), 25.6 (CH<sub>2</sub>), 24.5 (CH<sub>2</sub>), 14.8 (CH<sub>2</sub>), 12.0 (CH<sub>3</sub>), 11.9 (CH<sub>3</sub>). MS HRMS (TOF-APCI): *m/z* calcd for C<sub>38</sub>H<sub>42</sub>B<sub>2</sub>F<sub>4</sub>I<sub>2</sub>N<sub>4</sub>O<sub>3</sub>: 699.3379 [M-H<sup>-</sup>], ; found: 699.3307 [M-H<sup>-</sup>], Δ = 10.3 ppm.

**2.c. Synthesis of BODIPY-15:** In argon bubbled 200 mL dichloromethane, triethyl orthoformate (**11**) (700 mg, 4.73 mmol) and 2,4-dimethylpyrrole (**4**) (900 mg, 9.46 mmol) were mixed and stirred for 15 minutes. To this mixture, phosphoryl chloride (POCl<sub>3</sub>) (797.6 mg, 0,5 ml) was added and stirred further 2 hours. After stirring 2 h. at room temperature, TEA (5 ml) and BF<sub>3</sub>.OEt<sub>2</sub> (5 ml) was added and stirred again for further 1 hour. The reaction was stopped by extracting with water (3x200 mL). Organic phase was dried over Na<sub>2</sub>SO<sub>4</sub> and evaporated. The crude was purified by column chromatography with CHCl<sub>3</sub> yielded the orange product (**12**) (67 %). <sup>1</sup>H-NMR (400 MHz, CDCl<sub>3</sub>): δ<sub>H</sub> 6.97 (s, 1H, Ar-CH), 5.97 (s, 2H, Ar-CH), 2.45 (s, 6H, CH<sub>3</sub>), 2.18 (s, 6H, CH<sub>3</sub>); <sup>13</sup>C-NMR (100 MHz, CDCl<sub>3</sub>): δ<sub>C</sub> 156.8 (C<sub>ipso</sub>), 141.3 (C<sub>ipso</sub>), 133.5 (C<sub>ipso</sub>), 120.2 (CH), 119.1 (CH), 14.8 (CH<sub>3</sub>), 11.2 (CH<sub>3</sub>).

In an oven dried 250 ml round bottom flask, POCl<sub>3</sub> (1 ml) and DMF (1 ml) was stirred in ice baht under argon atmosphere for 15 minutes, , then stirred further 30 minutes at room temperature. Compound **12** (621 mg, 2.5 mmol) was dissolved in DCM (100 ml) and added slowly to the first solution at room temperature. After 4 hours stirring at room temperature, when the reaction was checked by TLC, it was seen that the reaction has been finished. Then, reaction mixture was poured into cold and saturated NaHCO<sub>3</sub> solution slowly in ice-bath. Mixture was stirred for 30 minutes and extracted with DCM (100 mlx3). Organic phase was dried over Na<sub>2</sub>SO<sub>4</sub> and evaporated. The crude was purified by column chromatography using CHCl<sub>3</sub> solvent yielded the orange product (**13**) (78 %). <sup>1</sup>H-NMR (400 MHz, CDCl<sub>3</sub>): δ<sub>H</sub> 9.99 (s, 1H, CHO), 7.17 (s, 1H, Ar-CH), 6.17 (s, 1H, Ar-CH), 2.73 (s, 3H, CH<sub>3</sub>), 2.55 (s, 3H, CH<sub>3</sub>), 2.47 (s, 3H, CH<sub>3</sub>), 1.51 ppm (s, 3H, CH<sub>3</sub>). <sup>13</sup>C-NMR (100 MHz, CDCl<sub>3</sub>): δ<sub>C</sub> 185.5 (CHO), 163.5 (C<sub>ipso</sub>), 157.2 (C<sub>ipso</sub>), 145.4 (C<sub>ipso</sub>), 140.6 (C<sub>ipso</sub>), 136.4 (C<sub>ipso</sub>), 131.1 (C<sub>ipso</sub>), 125.8 (C<sub>ipso</sub>), 122.0 (CH), 121.4 (CH), 15.2 (CH<sub>3</sub>), 12.7 (CH<sub>3</sub>), 11.5 (CH<sub>3</sub>), 10.4 (CH<sub>3</sub>).

In argon bubbled 200 mL dichloromethane, compound **13** (460 mg, 1.67 mmol) and 2,4-dimethylpyrrole (**4**) (313.67 mg, 3.33 mmol) were mixed. 1 drop of trifluoroacetic acid was also added. The reaction mixture stirred at room temperature overnight. Then *p*-chloranil (97.36 mg, 0.396 mmol) was added to the reaction medium. After stirring 4 hours at room temperature, TEA (triethylamine) (2 mL) and BF<sub>3</sub>.OEt<sub>2</sub> (2 mL) was added and stirred again for further 1 hour. The reaction was stopped by extracting with water (3x200 mL). Organic phase was dried over Na<sub>2</sub>SO<sub>4</sub> and evaporated. The crude was purified by column chromatography with MeOH (3%)-CHCl<sub>3</sub> yielded the orange product (**14**) (42 %). <sup>1</sup>H-NMR (400 MHz, CDCl<sub>3</sub>): δ<sub>H</sub> 7.16 (s, 1H, CH), 6.14 (s, 1H, CH), 6.01 (s, 2H, CH), 2.55 (s, 3H, CH<sub>3</sub>), 2.50 (s, 6H, CH<sub>3</sub>), 2.38 (s, 3H, CH<sub>3</sub>), 2.29 (s, 3H, CH<sub>3</sub>), 2.10 (s, 3H, CH<sub>3</sub>), 1.70 ppm (s, 6H, CH<sub>3</sub>). <sup>13</sup>C-NMR (100 MHz, CDCl<sub>3</sub>): δ<sub>C</sub> 160.3 (C<sub>ipso</sub>), 155.8 (C<sub>ipso</sub>), 151.5 (C<sub>ipso</sub>), 143.7 (C<sub>ipso</sub>), 142.5 (C<sub>ipso</sub>), 136.6 (C<sub>ipso</sub>), 134.7 (C<sub>ipso</sub>), 133.4 (C<sub>ipso</sub>), 132.3 (C<sub>ipso</sub>), 131.8 (C<sub>ipso</sub>), 124.2 (C-H), 121.3 (C-H), 120.7 (C-H), 120.5 (C-H), 14.9 (CH<sub>3</sub>), 14.7 (CH<sub>3</sub>), 13.9 (CH<sub>3</sub>), 12.7 (CH<sub>3</sub>), 11.4 (CH<sub>3</sub>), 9.8 (CH<sub>3</sub>), 8.7 (CH<sub>3</sub>).

In a 50 ml round bottom flask, BODIPY **14** (97.24 mg, 0.2 mmol), acrylic acid (72.06 mg, 1 mmol) and *t*-butylperbenzoate (77.69 mg, 0.4 mmol) were dissolved in acetic acid: dioxane: DMSO (3:9:1) solvent system. To the reaction mixture, Pd(OAc)<sub>2</sub> (8.98 mg, 0.04 mmol) catalyst was added under argon atmosphere. The reaction mixture was stirred at 35°C for 5 days. Progress of the reaction was checked by TLC. After compound **14** has been consumed, reaction was stopped. Reaction solvent was evaporated and purified by column chromatography with ethyl acetate yielded red compound (**15**) (20 %). <sup>1</sup>H-NMR (400 MHz, CDCl<sub>3</sub>): δ<sub>H</sub> 7.79 (d, 1H, J= 16.0 Hz, CH), 7.33 (s, 1H, CH), 7.28 (s, 1H, CH), 6.29 (d, 1H, J= 16.0 Hz, CH), 6.06 (s, 1H, CH), 2.74 (s, 3H, CH<sub>3</sub>), 2.59 (s, 6H, CH<sub>3</sub>), 2.47 (s, 6H, CH<sub>3</sub>), 2.19 (s, 3H, CH<sub>3</sub>), 1.73 (s, 6H, CH<sub>3</sub>). <sup>13</sup>C-NMR (100 MHz, CDCl<sub>3</sub>): δ<sub>C</sub> 178.0 (COOH), 160.3 (C<sub>ipso</sub>), 156.3 (C<sub>ipso</sub>), 152.3 (C<sub>ipso</sub>), 148.6 (C<sub>ipso</sub>), 137.3 (C<sub>ipso</sub>), 132.1 (C<sub>ipso</sub>), 131.0 (C<sub>ipso</sub>), 130.4 (C<sub>ipso</sub>), 130.0 (CH), 128.7 (C<sub>ipso</sub>), 126.8 (C<sub>ipso</sub>), 125.2 (CH), 122.2 (CH), 121.6 (CH), 121.5 (CH), 121.0 (C<sub>ipso</sub>), 116.4 (C<sub>ipso</sub>), 29.7 (CH<sub>3</sub>), 14.7 (CH<sub>3</sub>), 14.0 (CH<sub>3</sub>), 13.8 (CH<sub>3</sub>), 11.5 (CH<sub>3</sub>), 10.0 (CH<sub>3</sub>). MS HRMS (TOF-APCI): *m/z* calcd for C<sub>29</sub>H<sub>30</sub>B<sub>2</sub>F<sub>4</sub>I<sub>2</sub>N<sub>4</sub>O<sub>2</sub>: 563.2491 [M-H]<sup>-</sup>; found: 563.2385 [M-H]<sup>-</sup>, Δ = 18.8 ppm.

3.  $^1\text{H}$ ,  $^{13}\text{C}$  -NMR and Mass Spectra

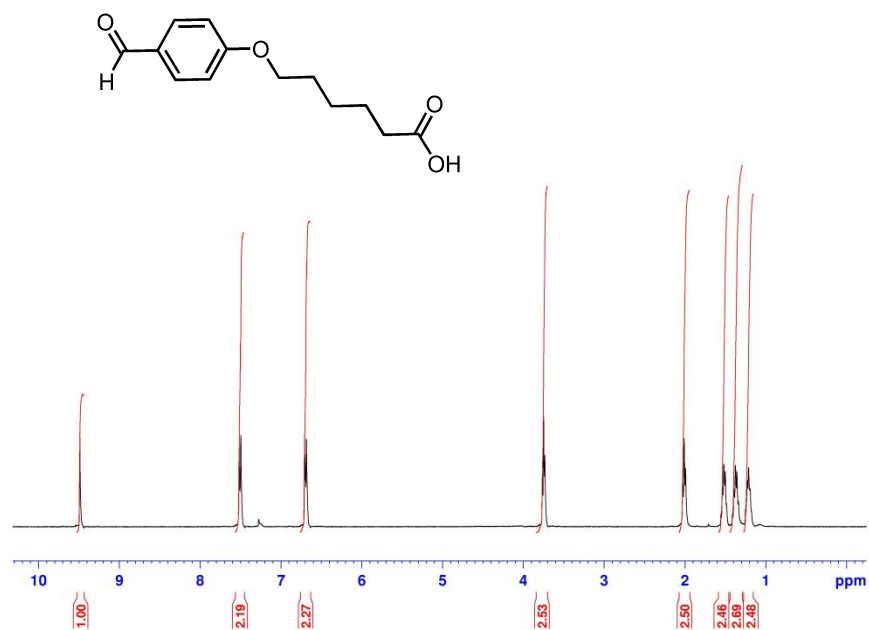

Fig. S1  $^1\text{H}$ -NMR spectrum of the compound 3 ( $\text{CDCl}_3$ , 400 MHz)

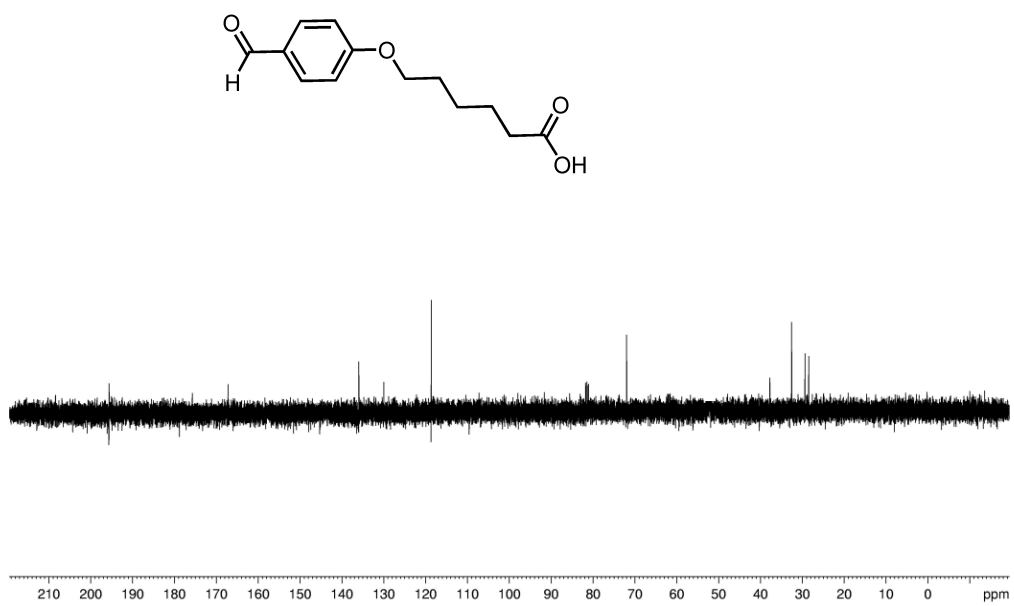

Fig. S2  $^{13}\text{C}$ -NMR spectrum of compound 3 ( $\text{CDCl}_3$ , 100 MHz).

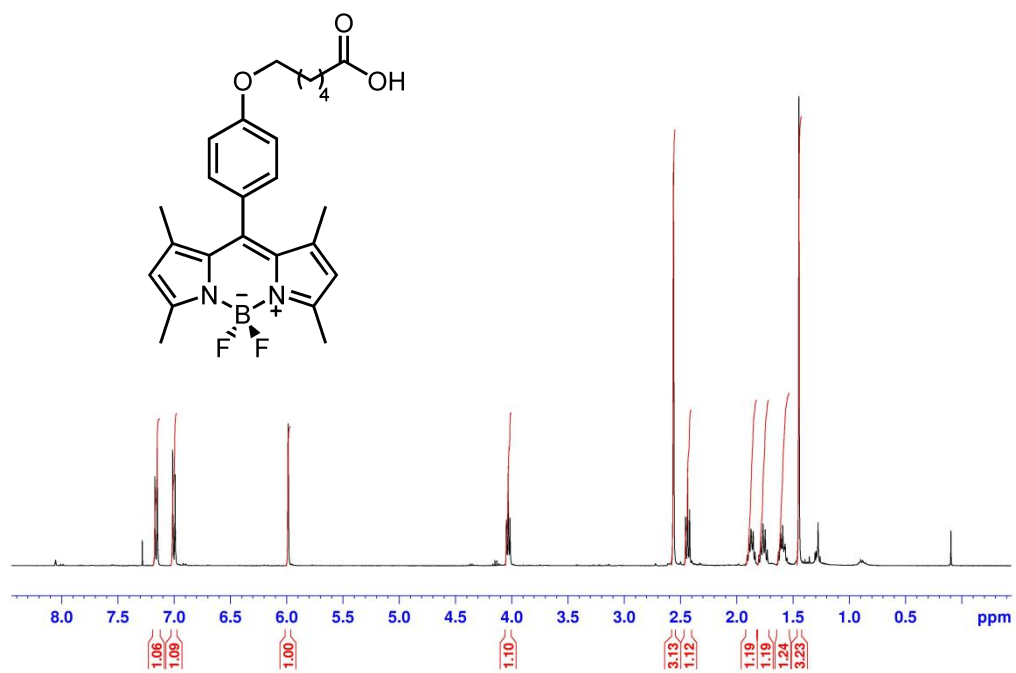

Fig. S3 <sup>1</sup>H-NMR spectrum of the compound 5 (CDCl<sub>3</sub>, 400 MHz)

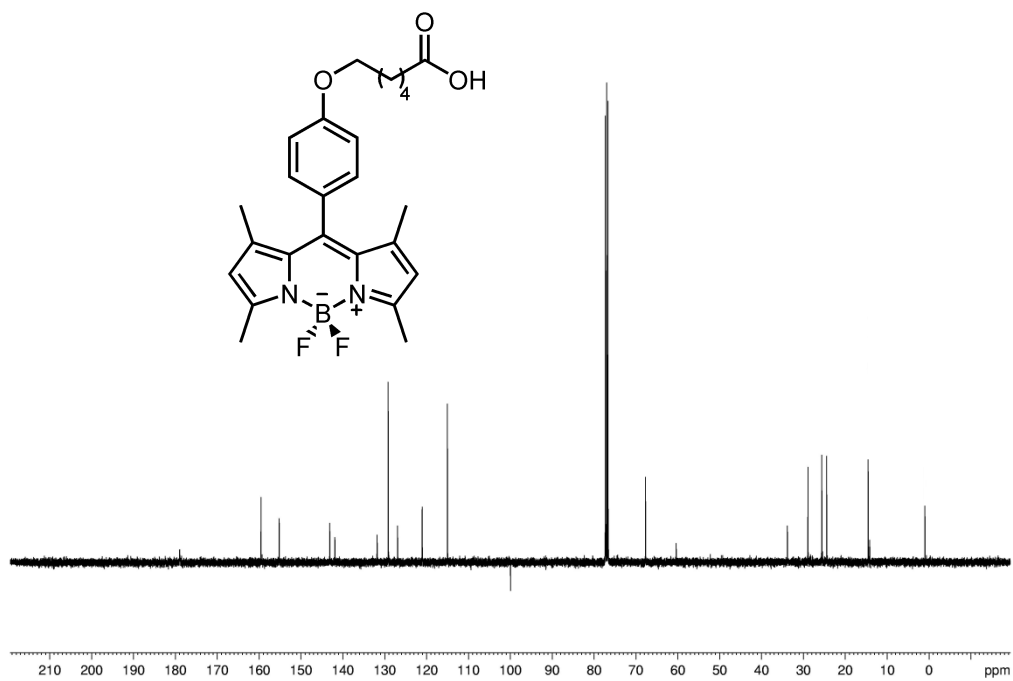

Fig. S4 <sup>13</sup>C-NMR spectrum of the compound 5 (CDCl<sub>3</sub>, 100 MHz)



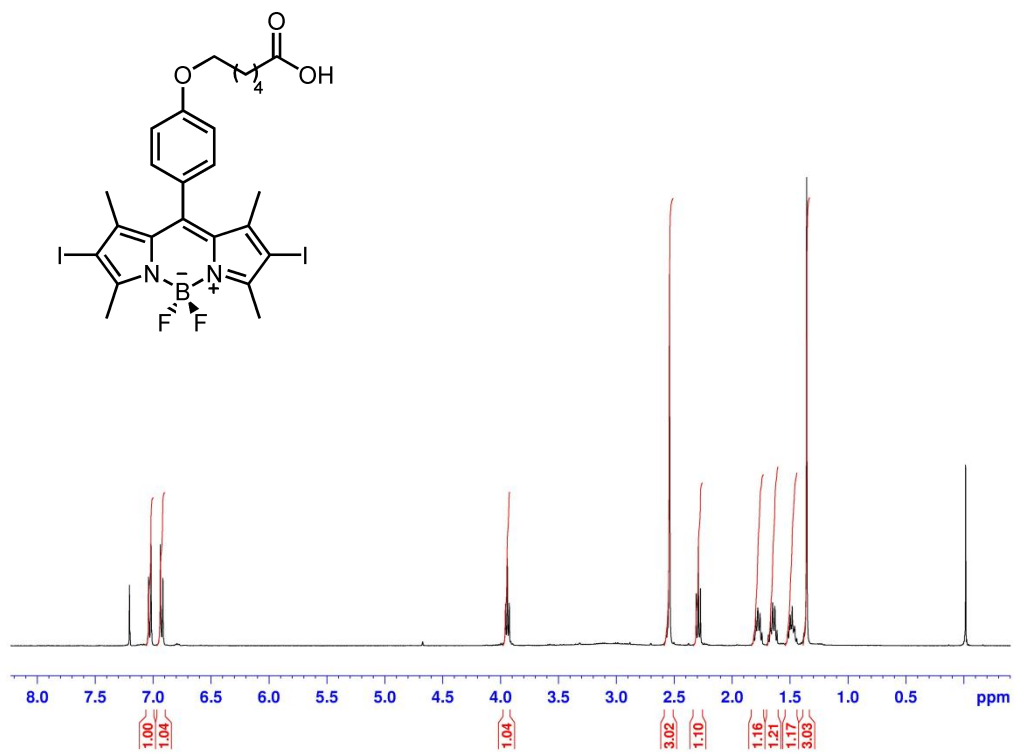

Fig. S5 <sup>1</sup>H-NMR spectrum of the compound 6 (CDCl<sub>3</sub>, 400 MHz)

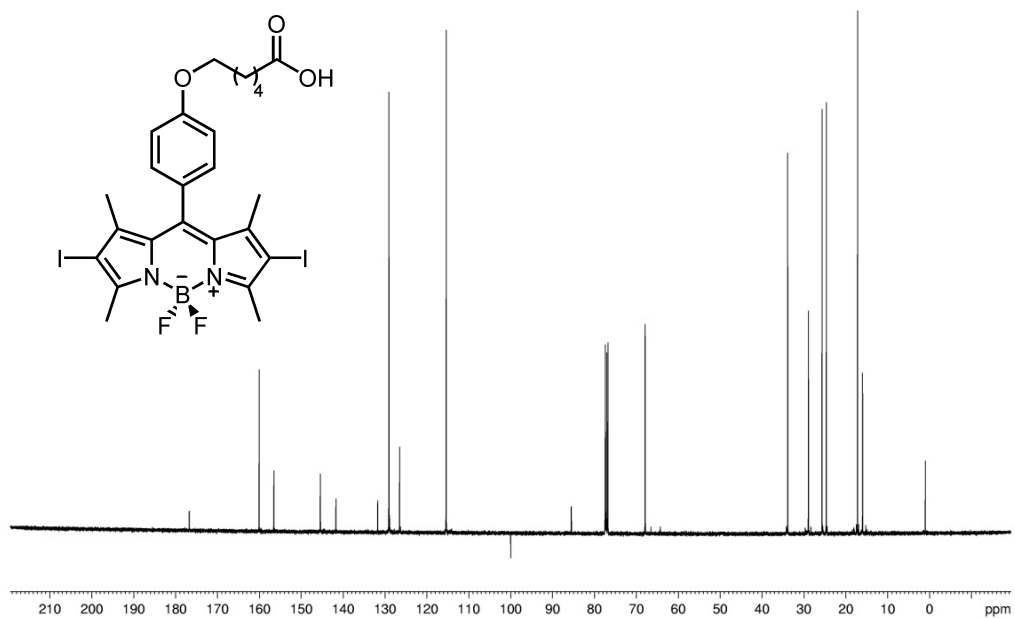

Fig. S6 <sup>13</sup>C-NMR spectrum of the compound 6 (CDCl<sub>3</sub>, 100 MHz)

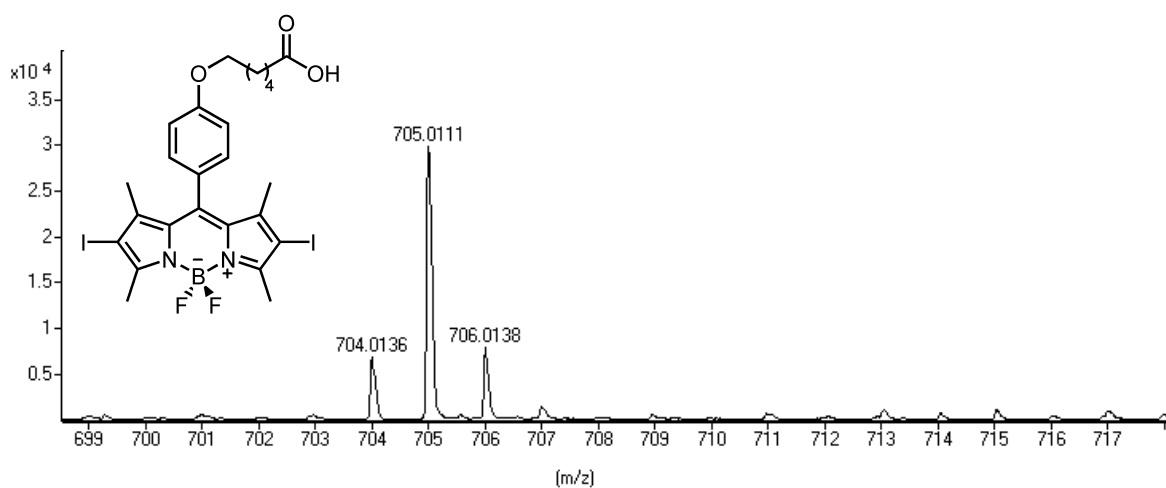

**Fig. S7** HR- Mass spectrum of the compound **6** ( $m/z$  calcd for  $C_{25}H_{27}BF_2I_2N_2O_3$ ; 705.0172  $[M-H]^+$ ; found: 705.0111  $[M-H]^+$ ,  $\Delta = 8.6$  ppm.)

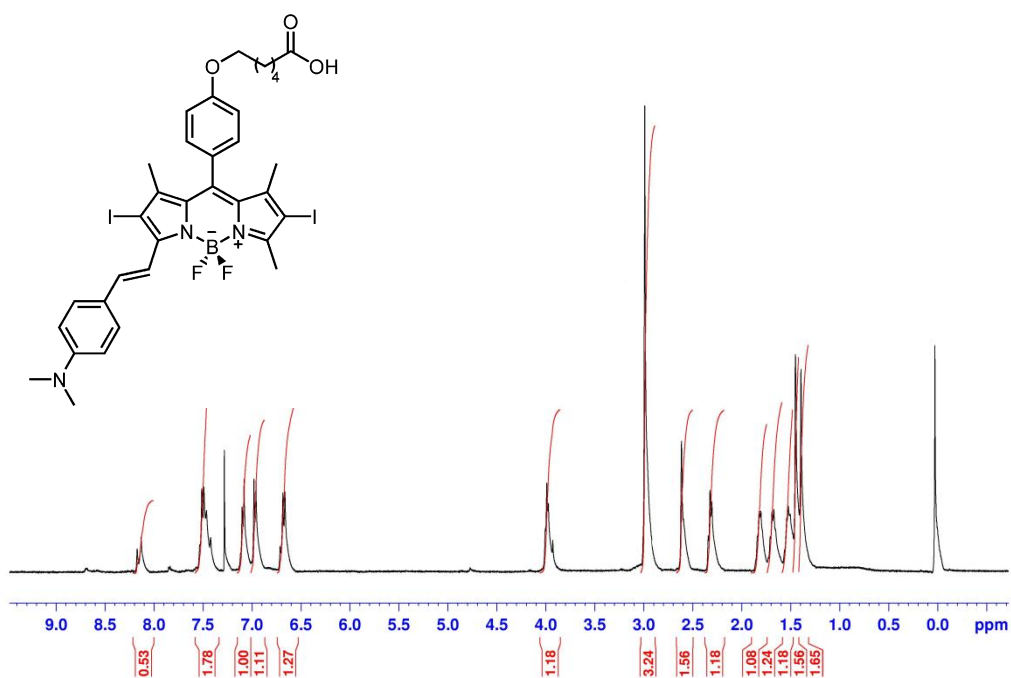

**Fig. S8**  $^1H$ -NMR spectrum of the compound **8** ( $CDCl_3$ , 400 MHz)

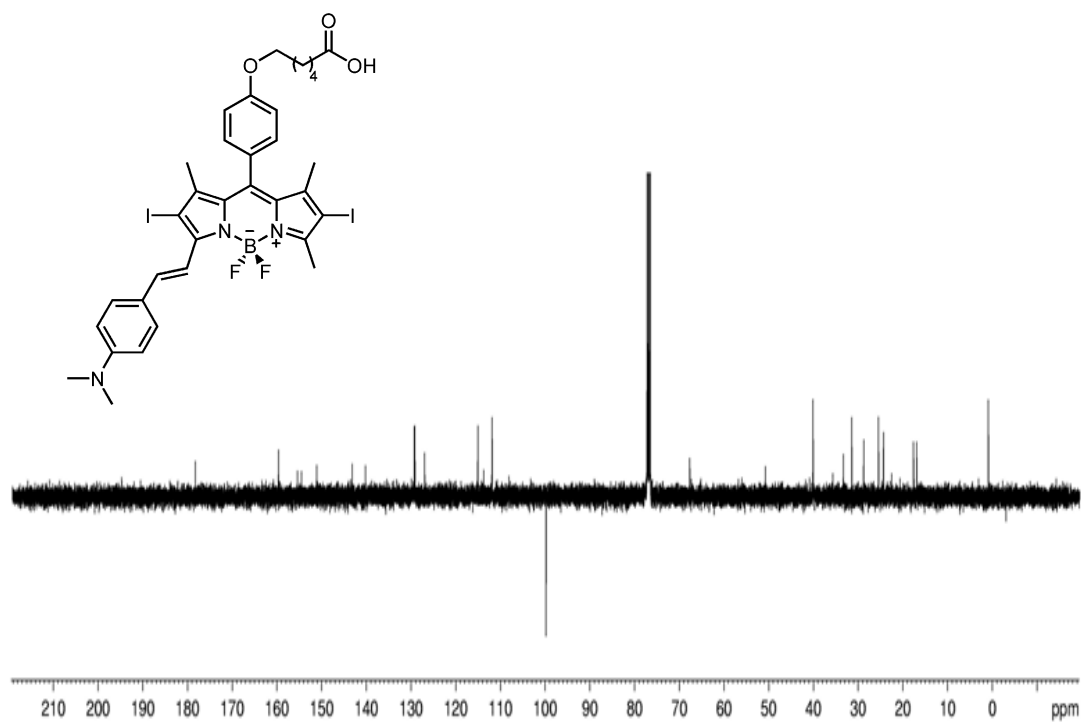

**Fig. S9**  $^{13}\text{C}$ -NMR spectrum of the compound **8** ( $\text{CDCl}_3$ , 100 MHz)

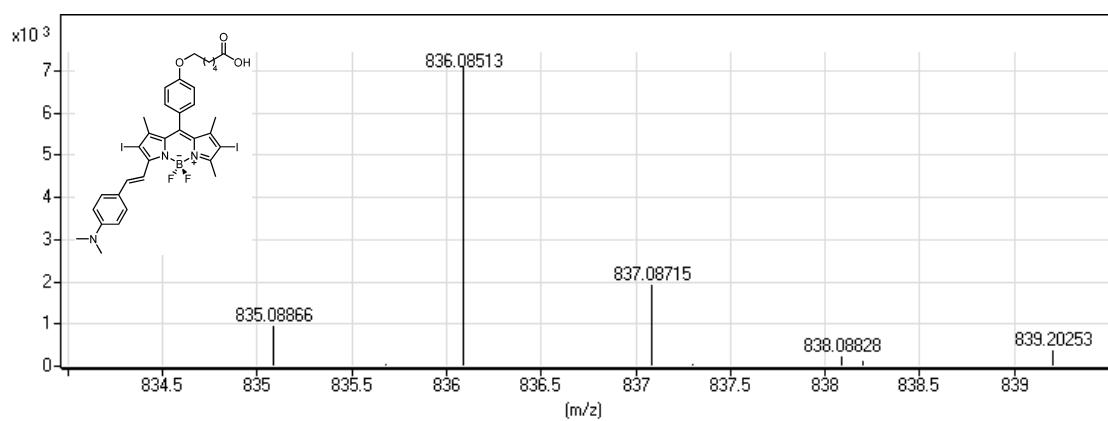

**Fig. S10** HR- Mass spectrum of the compound **8** ( $m/z$  calcd for  $\text{C}_{34}\text{H}_{36}\text{BF}_2\text{I}_2\text{N}_3\text{O}_3$ : 836.0907  $[\text{M}-\text{H}^+]$ ; found: 836.0851 $[\text{M}-\text{H}^+]$ ,  $\Delta = 6.7$  ppm).

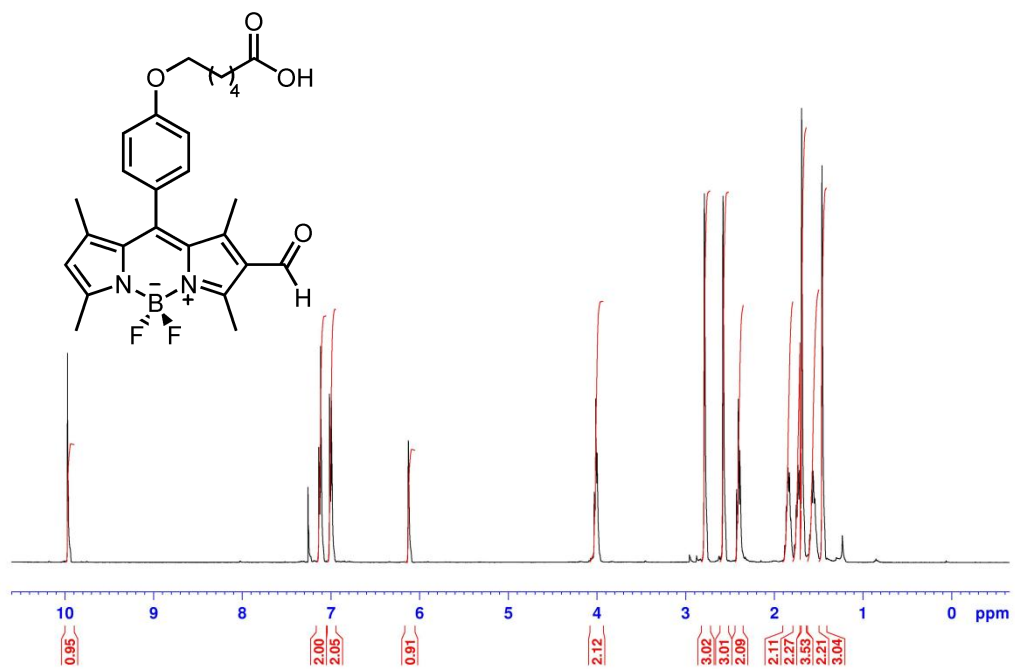

**Fig. S11** <sup>1</sup>H-NMR spectrum of the compound **9** (CDCl<sub>3</sub>, 400 MHz)

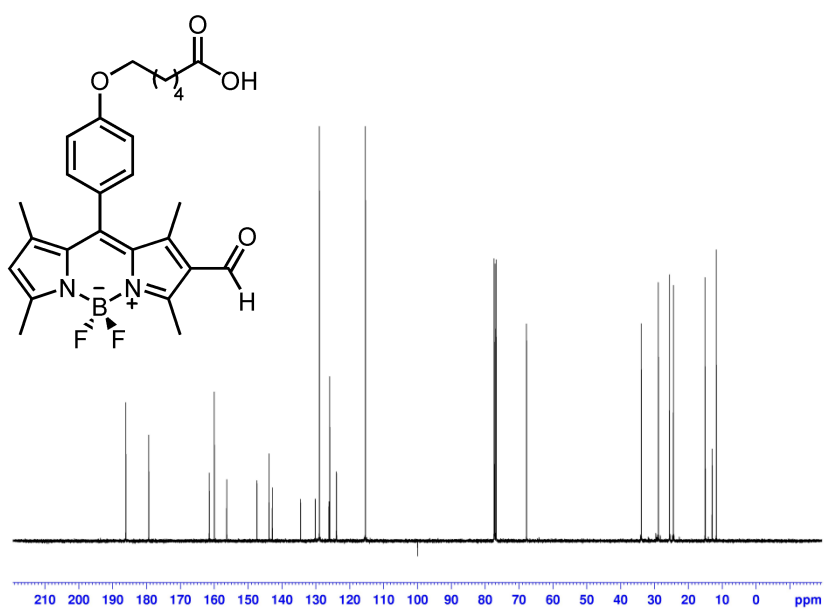

**Fig. S12** <sup>13</sup>C-NMR spectrum of the compound **9** (CDCl<sub>3</sub>, 100 MHz)

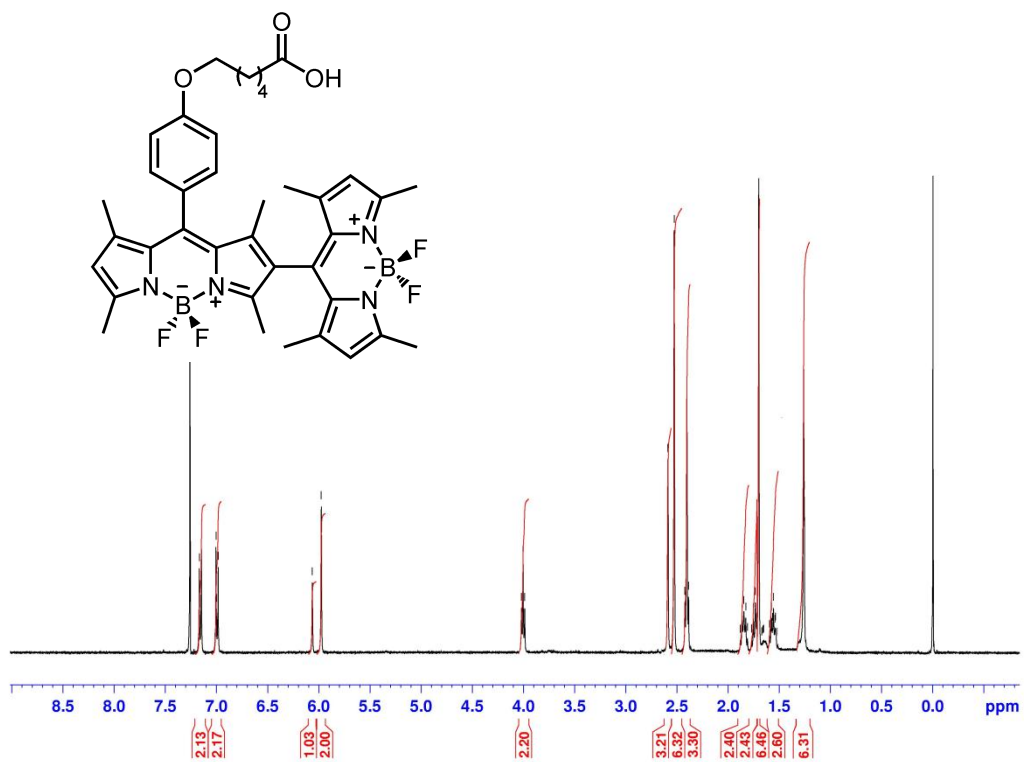

**Fig. S13**  $^1\text{H}$ -NMR spectrum of the compound **10** ( $\text{CDCl}_3$ , 400 MHz)

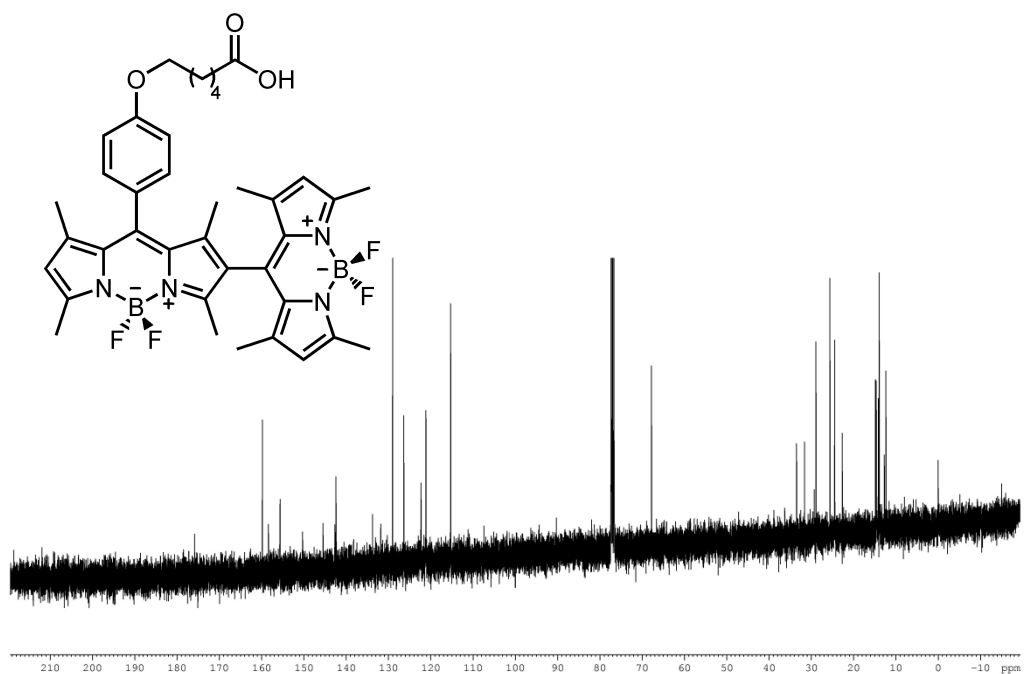

**Fig. S14**  $^{13}\text{C}$ -NMR spectrum of the compound **10** ( $\text{CDCl}_3$ , 400 MHz)

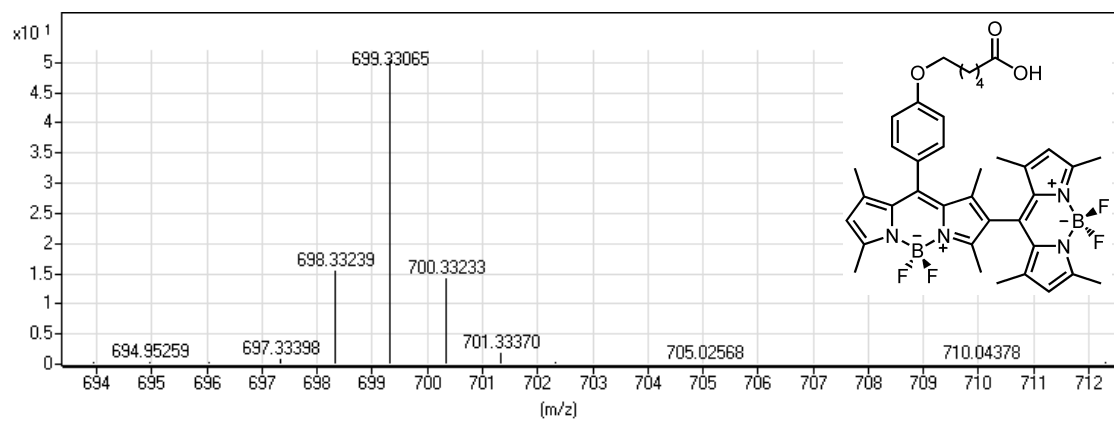

**Fig. S15** HR- Mass spectrum of the compound **10** ( $m/z$  calcd for  $C_{38}H_{42}B_2F_4I_2N_4O_3$ : 699,3379 [M-H]<sup>-</sup>, ; found: 699,3307 [M-H]<sup>-</sup>,  $\Delta = 10.3$  ppm.)

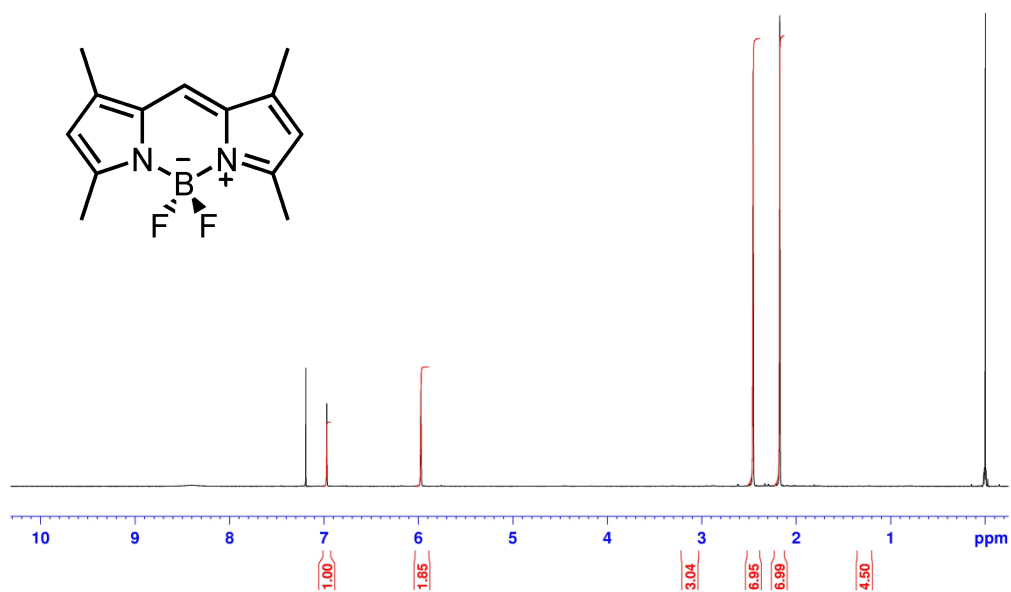

**Fig. S16**  $^1H$ -NMR spectrum of the compound **12** ( $CDCl_3$ , 400 MHz)

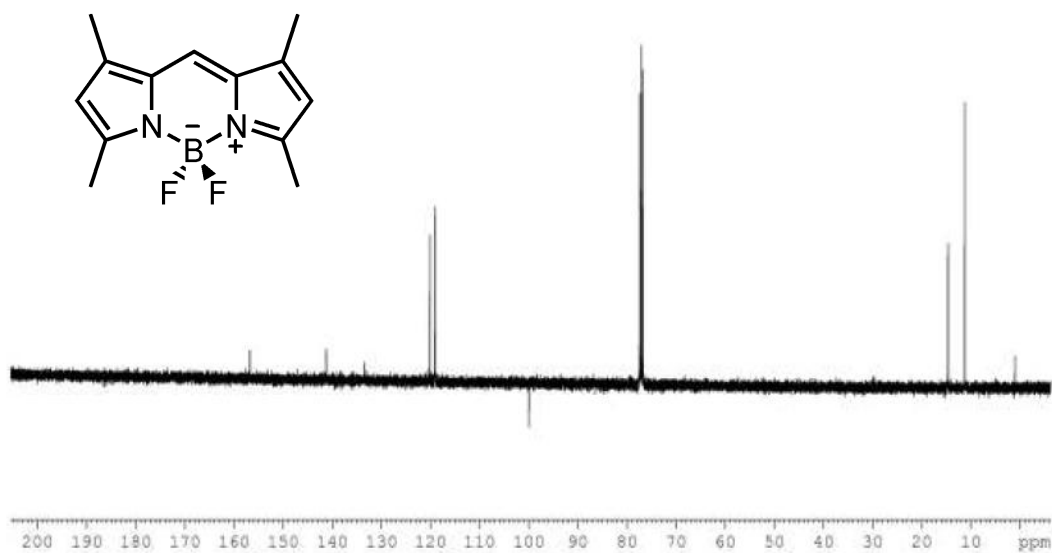

**Fig. S17**  $^{13}\text{C}$ -NMR spectrum of the compound **12** ( $\text{CDCl}_3$ , 100 MHz)

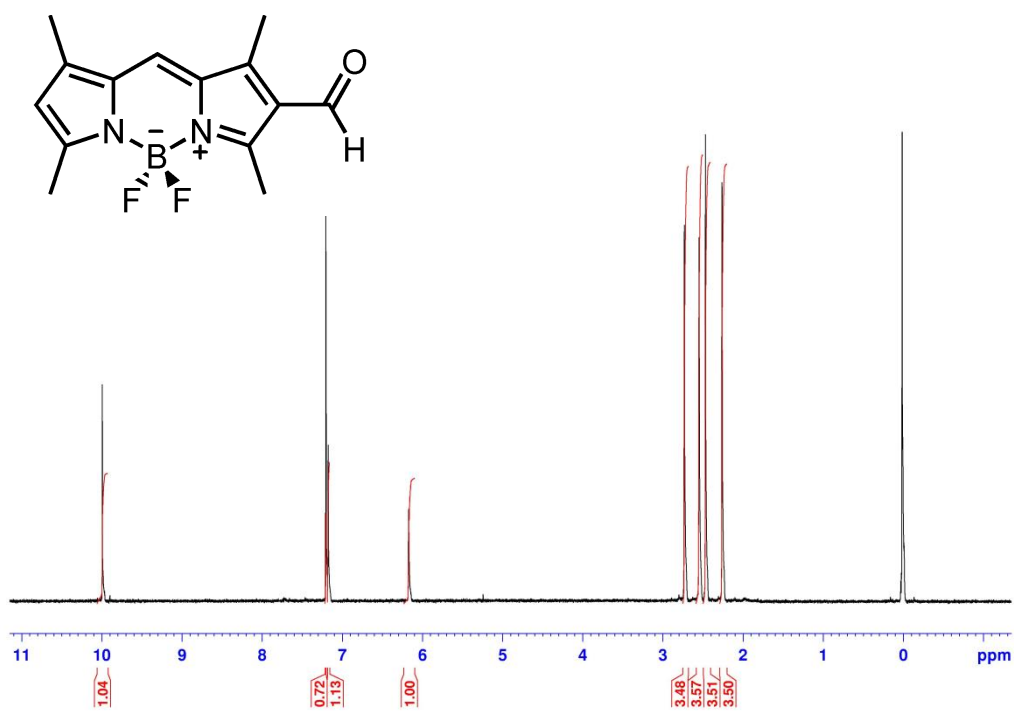

**Fig. S18**  $^1\text{H}$ -NMR spectrum of the compound **13** ( $\text{CDCl}_3$ , 400 MHz)

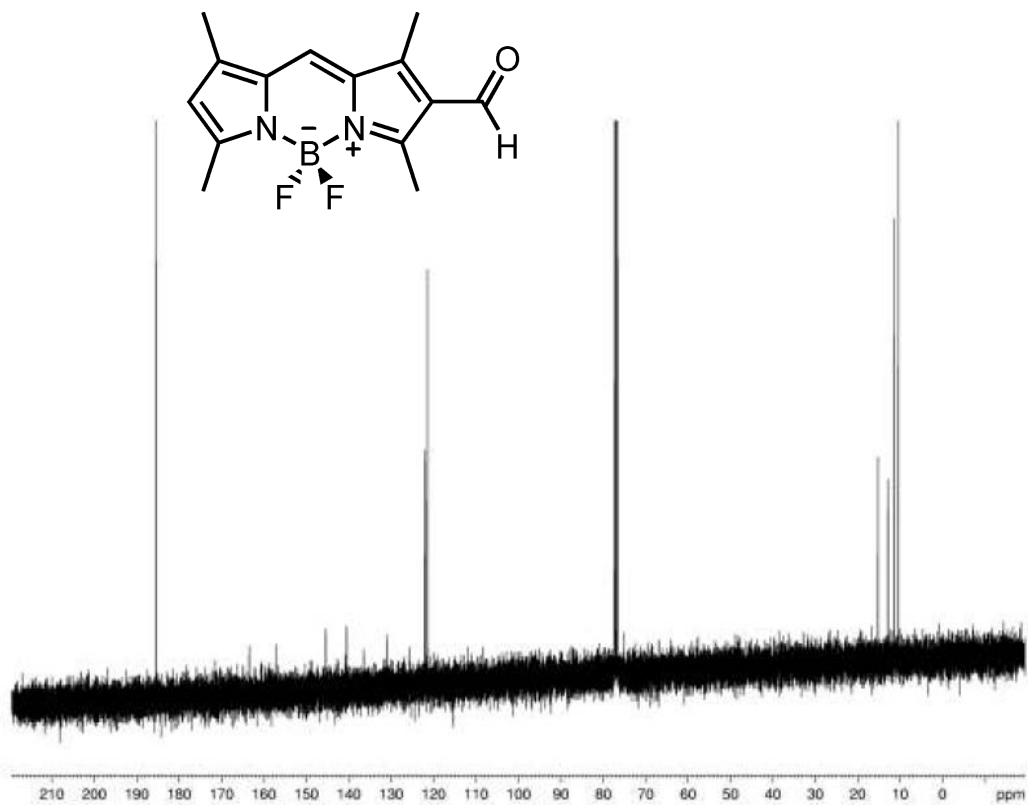

Fig. S19  $^{13}\text{C}$ -NMR spectrum of the compound **13** ( $\text{CDCl}_3$ , 100 MHz)

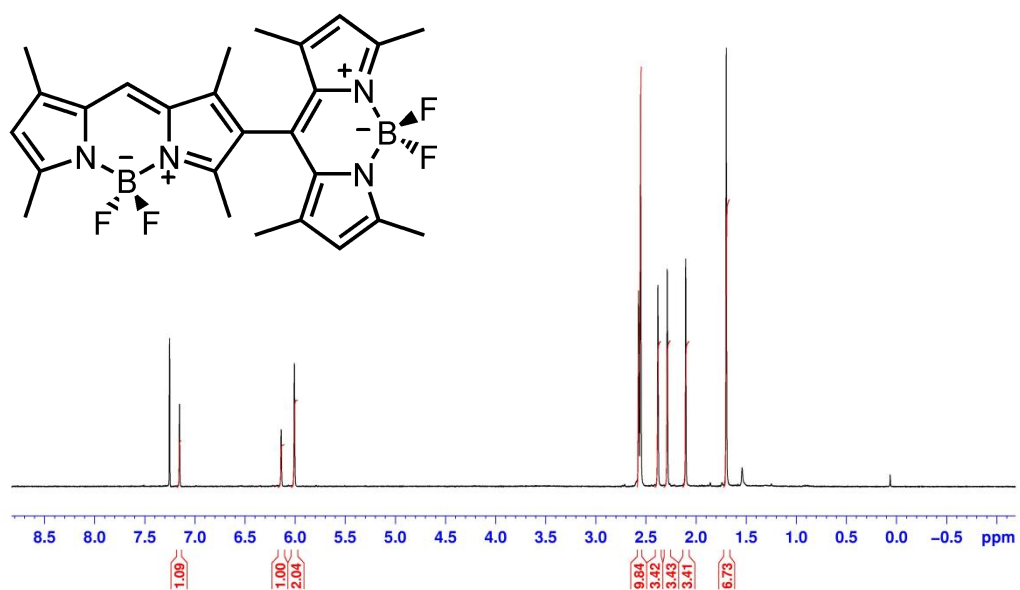

Fig. S20  $^1\text{H}$ -NMR spectrum of the compound **14** ( $\text{CDCl}_3$ , 400 MHz)



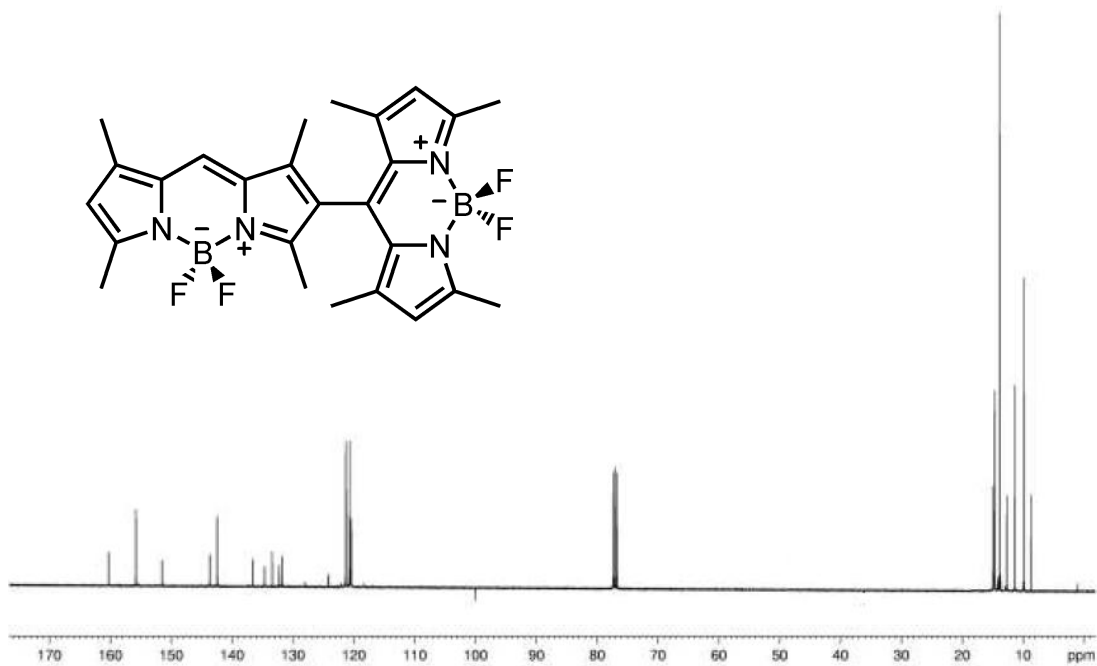

**Fig. S21**  $^{13}\text{C}$ -NMR spectrum of the compound **14** ( $\text{CDCl}_3$ , 100 MHz)

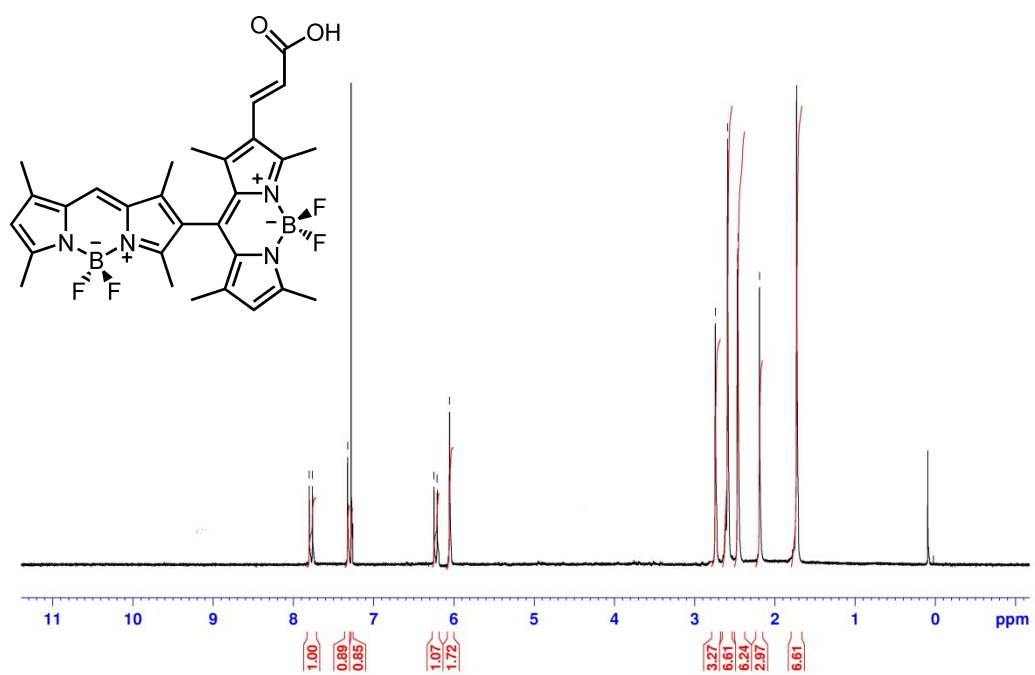

**Fig. S22**  $^1\text{H}$ -NMR spectrum of the compound **15** ( $\text{CDCl}_3$ , 400 MHz)

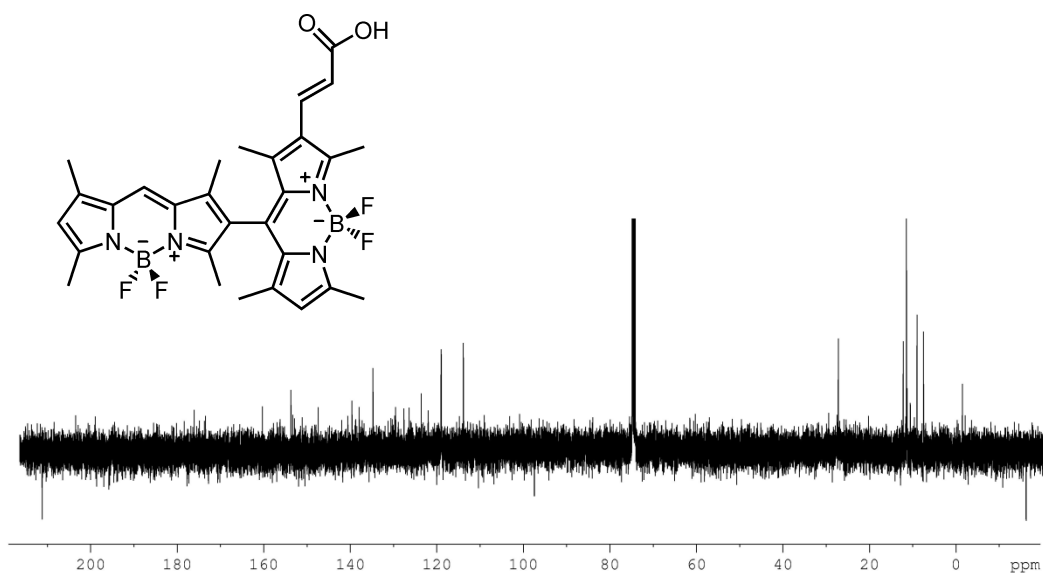

**Fig. S23**  $^{13}\text{C}$ -NMR spectrum of the compound **15** ( $\text{CDCl}_3$ , 100 MHz)

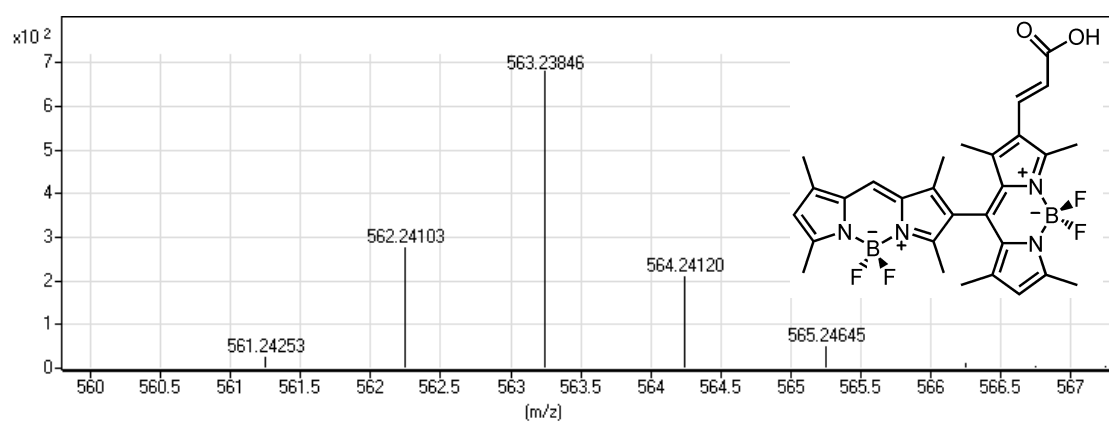

**Fig. S24** HR- Mass spectrum of the compound **15** ( $m/z$  calcd for  $\text{C}_{29}\text{H}_{30}\text{B}_2\text{F}_4\text{I}_2\text{N}_4\text{O}_2$ : 563.2491 [M-H]; found: 563.2385 [M-H],  $\Delta = 18.8$  ppm.)

#### 4. Characterization of upconverting nanoparticles

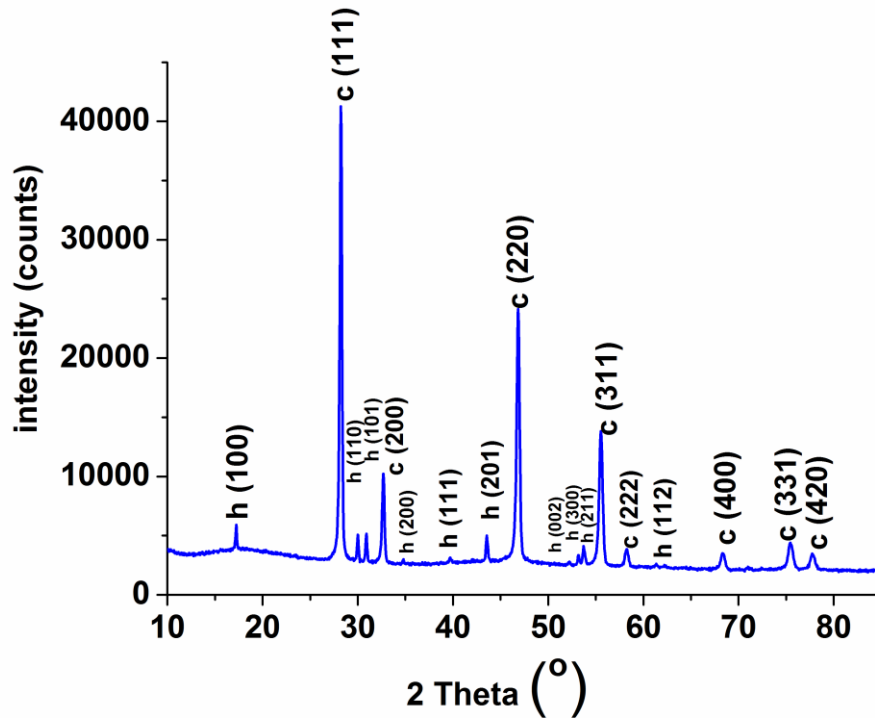

**Fig. S25** X-ray Diffraction (XRD) pattern of PEI coated UCNP ( $\text{NaYF}_4: \text{Yb}^{+3}, \text{Er}^{+3}/\text{Ce}^{+3}$ ) h: hexagonal, c:cubic phase peaks

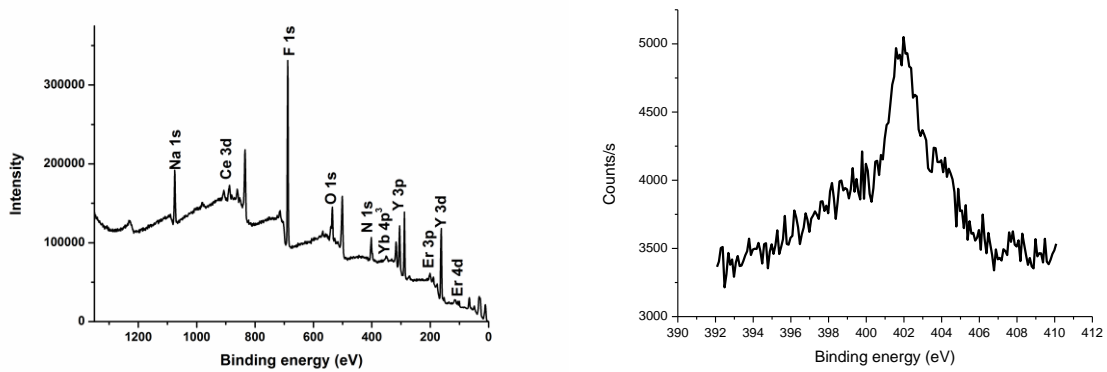

**Fig. S26** X-ray photoelectron spectrum (XPS) of PEI coated UCNP ( $\text{NaYF}_4: \text{Yb}^{+3}, \text{Er}^{+3}/\text{Ce}^{+3}$  (72: 20: 5:3 %)). Peak at 402 eV belongs to nitrogen atom which means that PEI was coated on the UCNP.

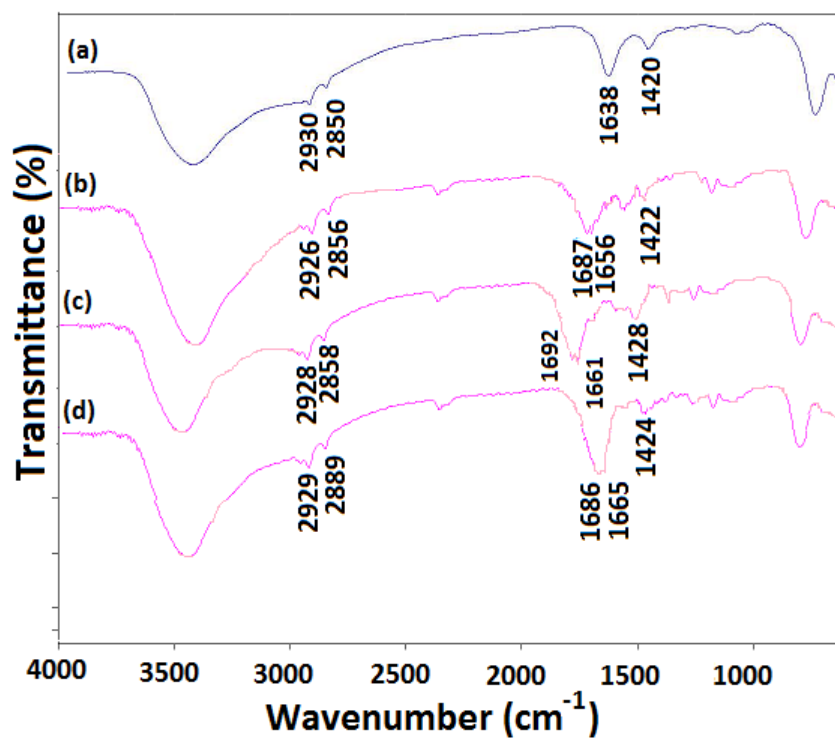

Fig. S27 FTIR spectrum of (a) PEI covered UCNP, (b)BOD8-UCNP, (c)BOD10-UCNP, (d)BOD15-UCNP

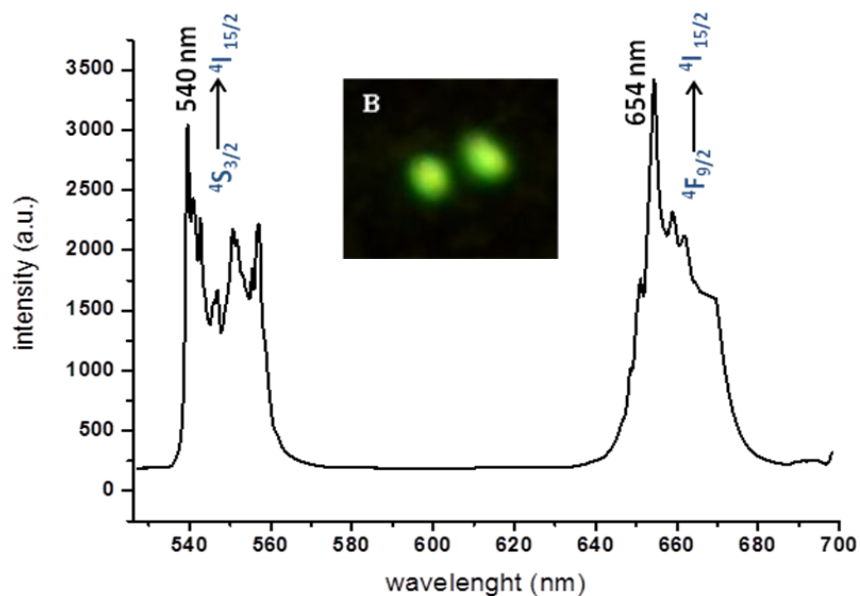

Fig. S28 Room temperature upconversion emission spectra of the  $\text{NaYF}_4: \text{Yb, Er/Ce}$  (72:20:5:3 mol %). Inset confocal picture was a photo from raman microscope showing the upconversion luminescence excited by 980 nm laser (50 mW)

## 5. Singlet oxygen measurements of BODIPY conjugated upconversion nanoparticles

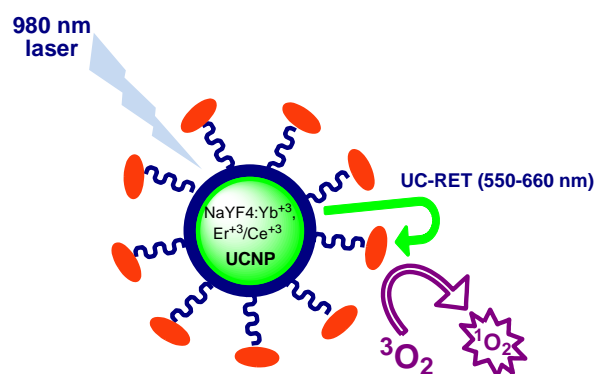

Fig. S29 Schematic illustration of BODIPY-conjugated UCNP

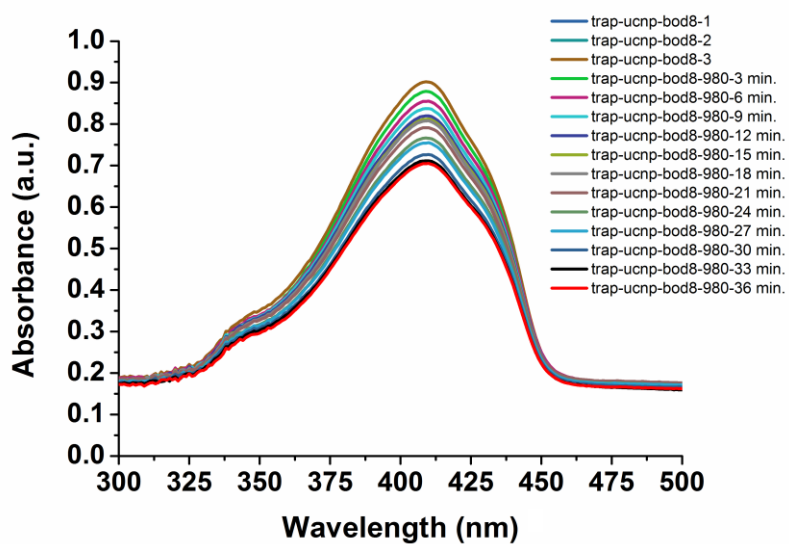

Fig. S30  $^1\text{O}_2$  generation from BOD-8@ UCNP under 980 nm laser

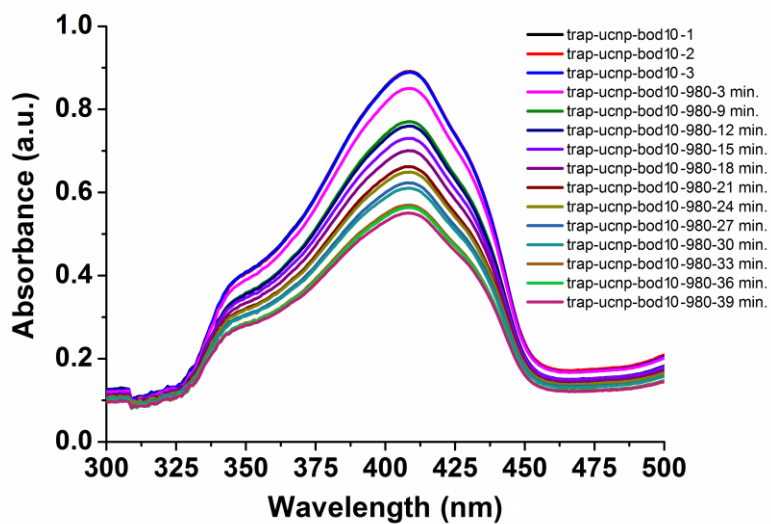

Fig. S31  $^1\text{O}_2$  generation from BOD-10 @ UCNP under 980 nm laser

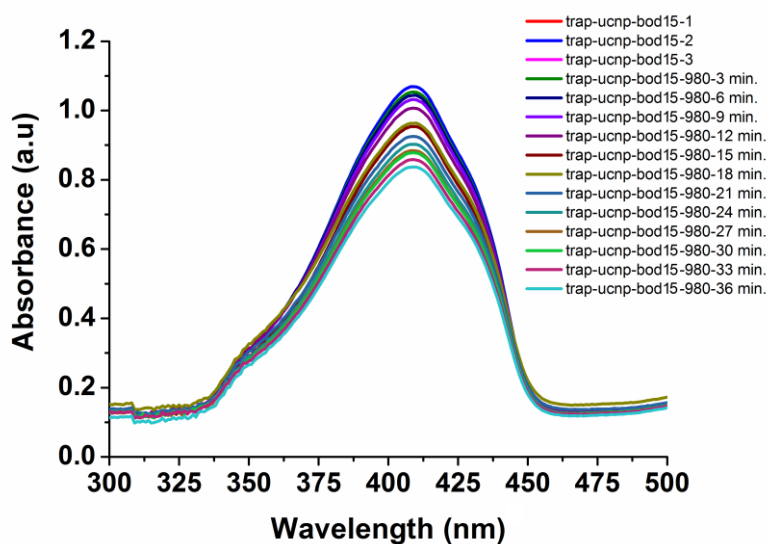

Fig. S32  $^1\text{O}_2$  generation from BOD-15 @ UCNP under 980 nm laser

## Control experiments

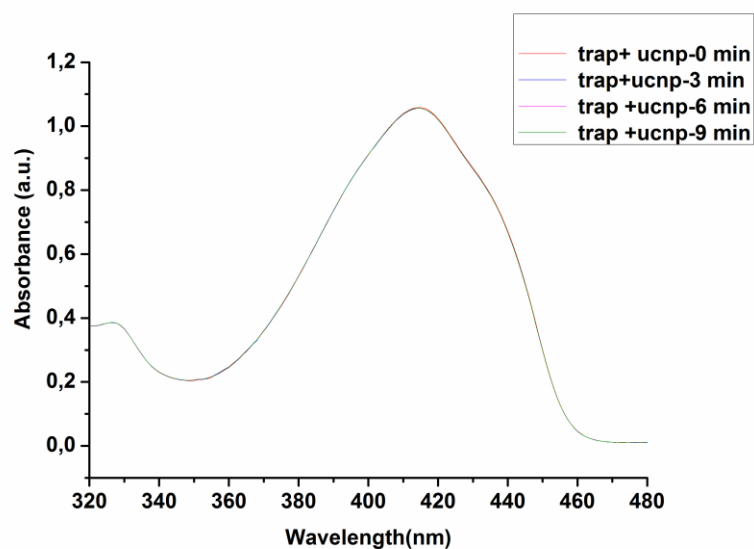

**Fig. S33** Control experiment-1: upconverting nanoparticles solution (0.4 mg/ml) without BODIPY dye in trap solution

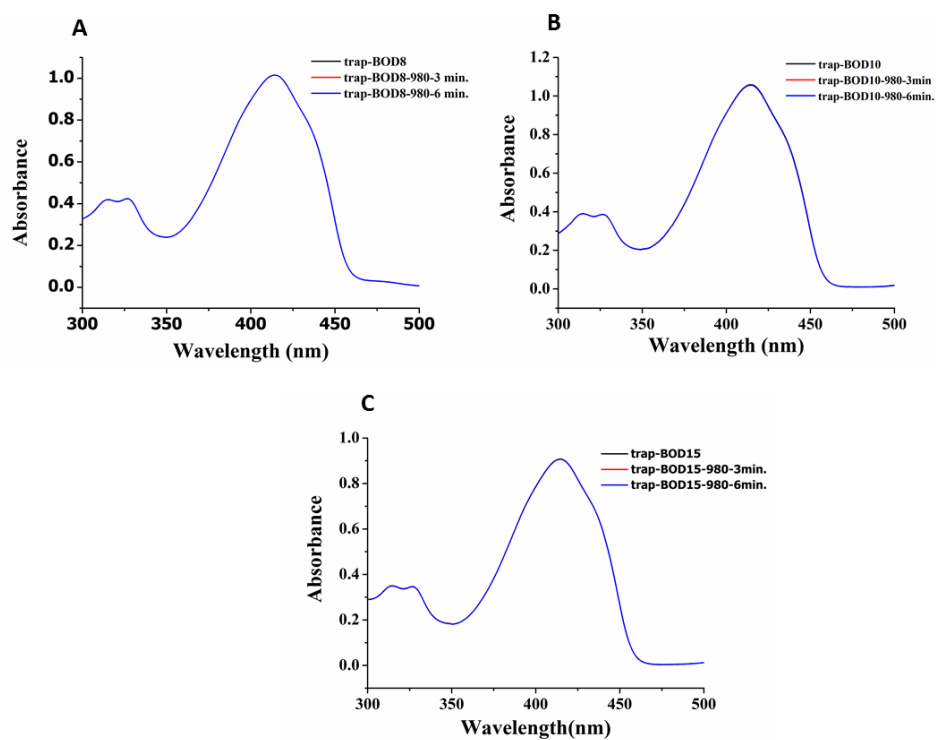

**Fig. S34** Control experiment-2: BODIPY dyes in the presence of DPBF trap molecule under 980 nm laser light

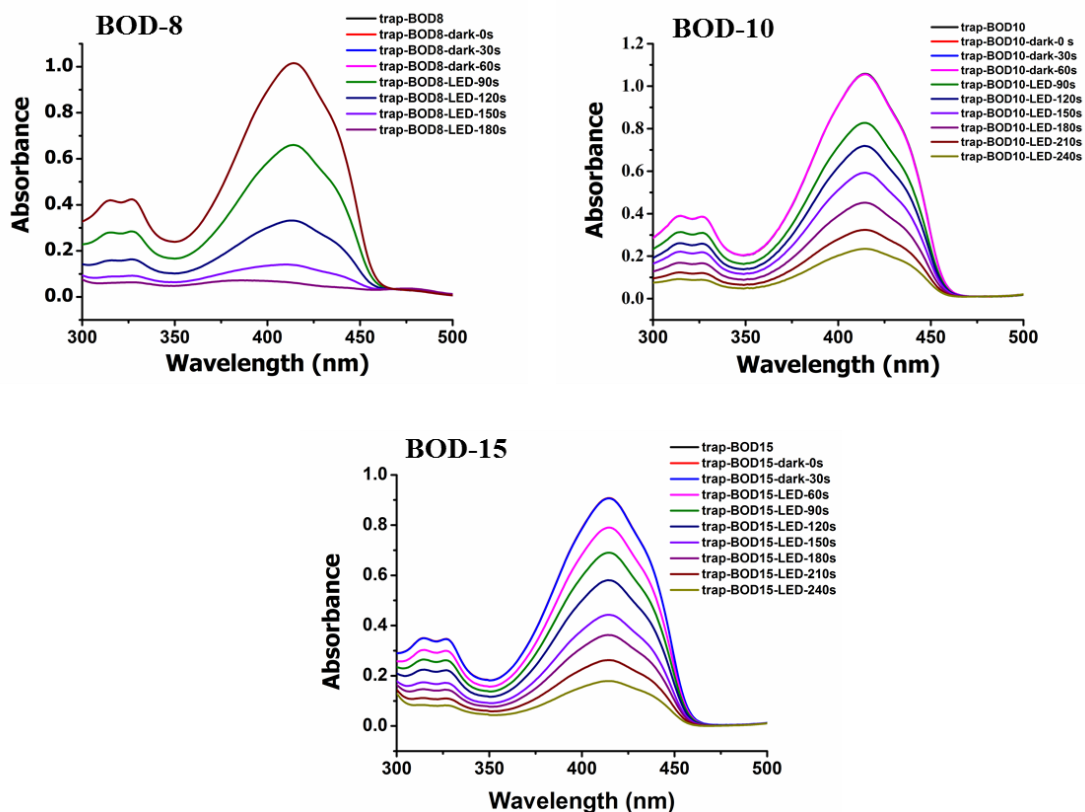

**Fig. S35** Singlet oxygen measurements of BODIPY dyes in the presence of DPBF trap molecule under laser light (610nm for BOD 8 and 520 nm for BOD10 and BOD15)

| (a) |                         |                                 |          |                | (b) |                 |                                      |          |                |
|-----|-------------------------|---------------------------------|----------|----------------|-----|-----------------|--------------------------------------|----------|----------------|
|     | A                       | B                               | C        | D              |     | A               | B                                    | C        | D              |
| 1   | Model                   | ExpDec1                         |          |                | 1   | Model           | ExpDecay1                            |          |                |
| 2   | Equation                | $y = A1 \cdot \exp(-x/t1) + y0$ |          |                | 2   | Equation        | $y = y0 + A1 \cdot \exp(-(x-x0)/t1)$ |          |                |
| 3   | Reduced Chi-Sqr         | 5,09789E-4                      |          |                | 3   | Reduced Chi-Sqr | 1,77598E-4                           |          |                |
| 4   | Adj. R-Square           | 0,93089                         |          |                | 4   | Adj. R-Square   | 0,98814                              |          |                |
| 5   |                         |                                 | Value    | Standard Error | 5   |                 |                                      | Value    | Standard Error |
| 6   | BOD-8                   | y0                              | 0,64447  | 0,05414        | 6   | BOD-10          | y0                                   | 0,47134  | 0,05539        |
| 7   | BOD-8                   | A1                              | 0,31644  | 0,04778        | 7   | BOD-10          | x0                                   | 0,93778  | 1,47786E7      |
| 8   | BOD-8                   | t1                              | 21,0536  | 7,54473        | 8   | BOD-10          | A1                                   | 0,50674  | 265012,60468   |
|     |                         |                                 |          |                | 9   | BOD-10          | t1                                   | 28,25884 | 5,30369        |
| (c) |                         |                                 |          |                |     |                 |                                      |          |                |
|     | A                       | B                               | C        | D              |     |                 |                                      |          |                |
| 1   | Equation                | $y = a + b \cdot x$             |          |                |     |                 |                                      |          |                |
| 2   | Weight                  | No Weighting                    |          |                |     |                 |                                      |          |                |
| 3   | Residual Sum of Squares | 0,00127                         |          |                |     |                 |                                      |          |                |
| 4   | Pearson's r             | -0,99052                        |          |                |     |                 |                                      |          |                |
| 5   | Adj. R-Square           | 0,97941                         |          |                |     |                 |                                      |          |                |
| 6   |                         |                                 | Value    | Standard Error |     |                 |                                      |          |                |
| 7   | BOD-15                  | Intercept                       | 1,00701  | 0,00562        |     |                 |                                      |          |                |
| 8   |                         | Slope                           | -0,00634 | 2,65059E-4     |     |                 |                                      |          |                |

**Fig. S36** Equations from the plot (Fig.4) of exponential fit for BOD 8 and BOD10 (a and b) and linear fit for BOD15.



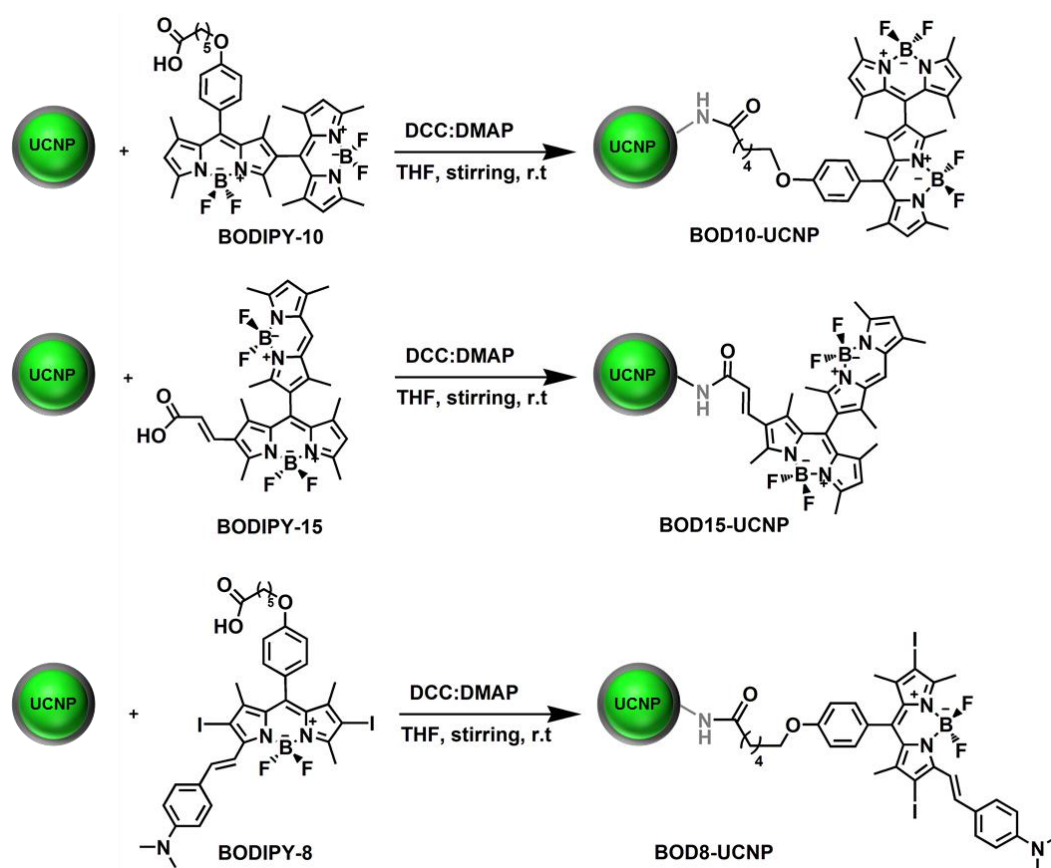

**Fig S37.** Synthetic procedure for the BODIPY conjugated upconverting nanoparticles.

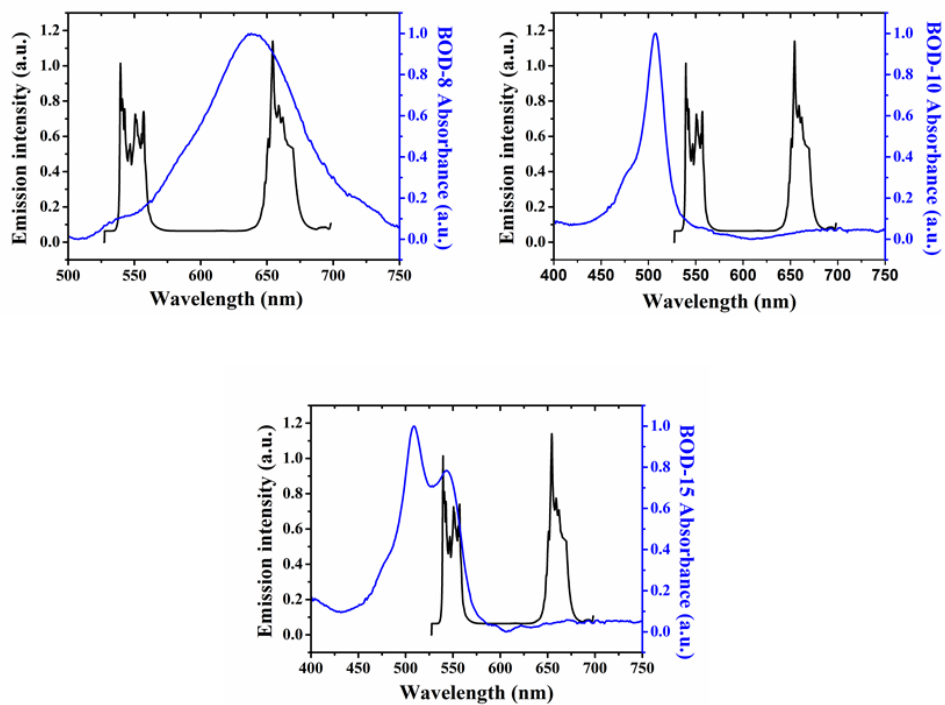

**Fig. S38** Overlaid emission spectra of PEI-coated  $\text{NaYF}_4:(\text{Yb}^{+3}, \text{Er}^{+3})/\text{Ce}^{+3}$  UCNPs (black line) and absorption spectra of BOD-8, BOD-10 and BOD-15, respectively.

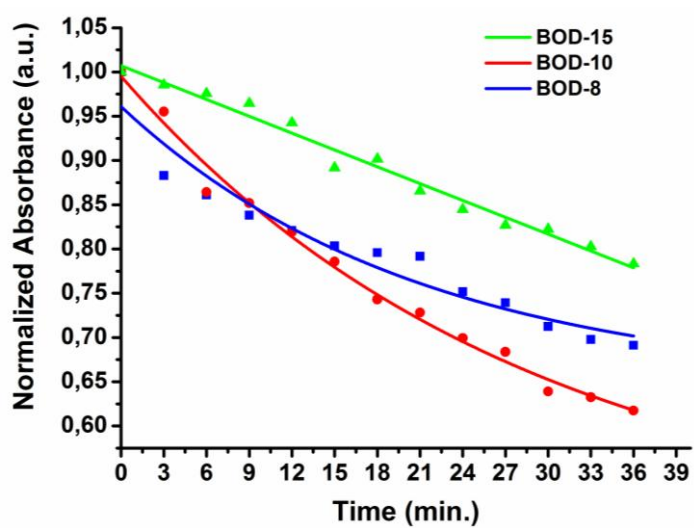

**Fig. S39** Changes in the absorption spectrum of the selective singlet oxygen trap 1,3-diphenyl-isobenzofuran (DPBF) in the presence of BODIPY-UCNP (0.4 mg/ml) in methanol solution. Reactions were done in triplicate.
